# Supplementary material
Source: MDPI journal article supplement (https://www.mdpi.com/2079-9276/7/1/8)
Supplement: s1 [file s1]

## Sheet: ChemData
Table S1. Chemical analyses of igneous and mineralized rocks. Major elements are in weight percent. Trace elements are in ppm, except for Au which is in ppb. See reference for methods of analyses, precission and accuraccy, and methods of sample collection. Latitude and longitude are in decimal degrees, NAD27. Not all total oxides=98 to 101% because CO2 is not included.
sample number	Area	type	lithology/mine zone	reference	SiO2	TiO2	Al2O3	Fe2O3T	MnO	MgO	CaO	Na2O	K2O	P2O5	LOI	total oxides	F	Ba	Rb	Sr	Zr	Nb	Y	V	Cr	Ni	Cu	Zn	Hf	Ta	U	Th	Au	Ag	As	B	Be	Cd	Co	Cs	Ga	Li	Mo	Pb	Sb	Se	Sn	Te	W
LMP-113	Laughlin Peak	igneous rock	basalt	Potter (1988)	48.83	1.44	15.04	11.747	0.18	9.14	10.01	3.9	1.07	0.52	0.69	102.567		703	17	1002	193	32	25			185	72	78
LMP-196	Laughlin Peak	igneous rock	phonolite	Potter (1988)	55.15	0.32	21.43	3.055	0.219	0.46	1.18	10.79	5.78	0.12	2	100.504		346	214	354	739	297	39	36	16	<10	9	172
LPM-118	Laughlin Peak	igneous rock	phonolite	Potter (1988)	56.28	0.22	22.81	2.421	0.179	0.15	1.01	10.72	5.84	0.1	2.59	102.32		1505	161	819	503	154	29	27	6	<10	4	129
LPM-120	Laughlin Peak	igneous rock	phonolite	Potter (1988)	56.21	0.23	21.76	2.472	0.182	0.15	1.05	10.82	5.84	0.06	1.41	100.184		778	200	534	619	174	28	31	2	<10	5	150	8	4	13	52
LPM-127	Laughlin Peak	igneous rock	phonolite	Potter (1988)	56.88	0.22	21.78	2.424	0.182	0.15	1.01	10.88	6	0.07	1.1	100.696		773	205	485	632	174	29	28	9	<10	3	151
LPM-132	Laughlin Peak	igneous rock	trachyte	Potter (1988)	62.51	0.35	18.65	2.844	0.172	0.32	1.68	6.91	5.08	0.14	0.58	99.236		2722	158	1125	602	93	37	16	3	<10	2	85	10	4	6	35
LPM-133	Laughlin Peak	igneous rock	phonolite	Potter (1988)	56.24	0.22	21.63	2.563	0.22	0.09	0.71	10.51	5.65	0.07	2.93	100.833		12	338	8	1536	405	42	16	5	<10	3	180
LPM-135	Laughlin Peak	igneous rock	phonotephrite	Potter (1988)	49.97	1.12	16.58	7.744	0.173	4.13	7.9	5.15	3.34	0.57	1.69	98.367		1565	90	1140	361	88	36	164	92	35	59	80
LPM-136	Laughlin Peak	igneous rock	lamprophyre	Potter (1988)	42.95	1.21	12.36	9.64	0.18	9.12	12.65	3.66	1.34	0.77	5.19	99.07		1556	39	1339	247	84	21			217	70	92
LPM-144	Laughlin Peak	igneous rock	basalt	Potter (1988)	48.5	1.8	16.74	11.028	0.17	5.78	9.27	5.22	1.92	1.06	0.55	102.038		110	26	1631	283	49	25			31	26	83
LPM-145	Laughlin Peak	igneous rock	phonolite	Potter (1988)	53.51	0.29	20.36	2.915	0.227	0.2	0.64	10.26	4.96	0.08	5.29	98.732		291	338	242	1359	473	43	24	4	<10	11	227
LPM-146	Laughlin Peak	igneous rock	phonotephrite	Potter (1988)	51.99	0.91	18.46	6.5	0.189	1.92	4.35	6.99	1.3	0.53	3.71	96.849		1887	73	1327	458	115	35	99	4	<10	11	95
LPM-148	Laughlin Peak	igneous rock	basalt	Potter (1988)	48.13	1.81	16.7	11.315	0.16	5.14	9.31	4.92	1.88	1.05	0.8	101.215		1205	27	1640	284	47	23			30	43	84
LPM-149	Laughlin Peak	igneous rock	phonolite	Potter (1988)	54.65	0.2	21.2	2.317	0.172	0.14	0.64	10.22	5.36	0.06	2.93	97.889		62	70	79	774	257	36	19	10	<10	4	150
LPM-151	Laughlin Peak	igneous rock	phonolite	Potter (1988)	55.64	0.19	21.63	1.776	0.214	0.04	0.26	10.96	5.15	0.08	2.11	98.05		52	288	73	957	325	42	10	8	<10	7	206
LPM-152	Laughlin Peak	igneous rock	phonolite	Potter (1988)	54.48	0.2	21.16	2.399	0.193	0.15	0.73	10.37	5.57	0.08	2.09	97.422		65	263	137	891	298	38	16	5	<10	3	180
LPM-158	Laughlin Peak	igneous rock	phonolite	Potter (1988)	54.62	0.32	21.37	2.744	0.169	0.33	1.3	10.68	5.32	0.13	0.87	97.853		1179	164	972	534	197	31	38		<10	5	138
LPM-159	Laughlin Peak	igneous rock	phonotephrite	Potter (1988)	51.3	1.16	16.86	7.697	0.174	4.41	8.27	5.25	3.1	0.56	0.71	99.491		1608	71	1016	357	88	33	165	130	35	47	76
LPM-162	Laughlin Peak	igneous rock	phonotephrite	Potter (1988)	50.43	1.18	18.05	7.777	0.181	2.95	6.34	5.81	3.38	0.64	3.04	99.778		1852	73	1226	394	102	34	143	19	12	37	82	7	4	5	21
LPM-166	Laughlin Peak	igneous rock	basalt	Potter (1988)	46.98	1.45	12.79	12.153	0.19	13.92	8.99	3.67	0.99	0.58	0.51	102.223		680	14	916	176	34	19			456	66	84
LPM-180	Laughlin Peak	igneous rock	phonolite	Potter (1988)	55.46	0.26	21.65	2.642	0.188	0.25	1.42	10.99	5.33	0.11	1.19	99.49		466	233	445	839	233	33	25		<10	7	154
LPM-182	Laughlin Peak	igneous rock	phonolite	Potter (1988)	55.56	0.22	21.81	1.987	0.204	0.07	0.47	10.94	5.08	0.1	2.46	98.901		141	359	66	1587	451	42	14	8	<10	10	201
LPM-186	Laughlin Peak	igneous rock	phonolite	Potter (1988)	57.72	0.15	22.85	1.896	0.174	0.06	0.59	11.17	5.76	0.09	1.37	101.83		20	251	12	890	222	32	8	2	<10	11	149
LPM-191	Laughlin Peak	igneous rock	basalt	Potter (1988)	49.59	1.66	15.71	10.364	0.19	6.08	9.58	4.85	1.79	0.8	0.68	101.294		1262	30	1461	270	57	22			53	51	87
LPM-20	Laughlin Peak	igneous rock	phonolite	Potter (1988)	56.4	0.23	21.9	2.625	0.179	0.17	0.86	10.5	5.79	0.09	0.94	99.684		781	212	530	618	172	28	33	5	<10	4	151
LPM-208	Laughlin Peak	igneous rock	phonolite	Potter (1988)	58.7	0.25	20.16	2.39	0.192	0.32	1.32	8.33	5.64	0.1	2.81	100.212		260	238	145	1023	306	35	17		<10	5	143	14	6	16	64
LPM-209	Laughlin Peak	igneous rock	lamprophyre	Potter (1988)	43.35	1.24	15.28	8.553	0.183	5.7	9.92	4.62	2.34	0.84	7.31	99.336		1925	58	1429	265	85	33	215	131	49	53	91	4	4	3	20
LPM-214	Laughlin Peak	igneous rock	phonolite	Potter (1988)	53.08	0.26	21.02	2.924	0.202	0.41	1.07	10.87	5.67	0.12	1.62	97.246		327	240	350	742	297	37	41	11	<10	4	174	10	10	29	77
LPM-217	Laughlin Peak	igneous rock	phonolite	Potter (1988)	57.86	0.26	19.93	2.411	0.22	0.29	1.27	8.76	5.61	0.09	3.38	100.081		234	238	130	1153	208	37			<10	<10	143
LPM-218	Laughlin Peak	igneous rock	phonolite	Potter (1988)	57.37	0.25	19.84	2.358	0.185	0.26	1.29	8.68	5.64	0.09	3.11	99.073		232	232	123	945	204	30	18	10	<10	1	137
LPM-218a	Laughlin Peak	igneous rock	phonolite	Potter (1988)	56.48	0.14	20.5	1.766	0.26	0.08	0.82	10.27	5.25	0.06		95.626		137		117	109		48	11	4		1	169
LPM-219	Laughlin Peak	igneous rock	phonolite	Potter (1988)	57.31	0.25	19.9	2.335	0.187	0.22	1.01	8.98	5.89	0.17	1.41	97.662		245	248	116	976	207	34	20	7	<10	9	139
LPM-228	Laughlin Peak	igneous rock	lamprophyre	Potter (1988)	44.42	1.38	16.63	8.916	0.193	4.92	10.23	5.16	2.12	1.07	5.4	100.439		1715	62	1948	322	97	35	211	57	40	52	79
LPM-231	Laughlin Peak	igneous rock	phonolite	Potter (1988)	56.1	0.18	22.94	1.68	0.376	0.05	0.36	11.64	5.37	0.09	1.5	100.286		37	412	29	1401	298	71	11	3	<10	7	280
LPM-232	Laughlin Peak	igneous rock	phonolite	Potter (1988)	57.34	0.18	22.22	1.602	0.374	0.05	0.43	11	5.52	0.08	1.6	100.396		43	399	35	1393	301	71	10		<10	7	283	25	9	27	100
LPM-240	Laughlin Peak	igneous rock	phonolite	Potter (1988)	60.66	0.2	19.36	2.61	0.7	0.11	0.89	9.75	5.08	0.08	1.36	100.8		148	611	126	1720	397	94			<10	11	452
LPM-242	Laughlin Peak	igneous rock	phonolite	Potter (1988)	50.6	0.37	20.75	3.14	0.159	0.42	2.18	11.94	5.01	0.17	3.19	97.929		763	172	1313	940	202	30	64	7	<10	11	145	12	6	26	58
LPM-250	Laughlin Peak	igneous rock	phonolite	Potter (1988)	51.34	0.35	21.3	3.036	0.153	0.34	1	12.63	5.04	0.12	2.83	98.139		695	181	1212	952	213	28	60	2	<10	9	142
LPM-253	Laughlin Peak	igneous rock	basalt	Potter (1988)	46.37	1.39	14.18	11.904	0.2	8.71	10.99	4.88	1.25	0.9	0.67	101.444		1120	23	1489	183	42	26			166	65	83
LPM-260	Laughlin Peak	igneous rock	phonolite	Potter (1988)	60.63	0.2	19.05	2.463	0.67	0.05	0.86	10.16	4.98	0.08	1.09	100.233		166	589	131	1625	386	90			<10	<10	395	35	11	38	140
LPM-35	Laughlin Peak	igneous rock	lamprophyre	Potter (1988)	41.71	1.57	14.81	10.301	0.208	6.88	12.1	3.96	2.01	1.1	5.64	100.289		1554	56	1511	274	89	33	234	103	59	69	80
LPM-47	Laughlin Peak	igneous rock	basalt	Potter (1988)	59.37	1.01	17.17	6.177	0.02	2.52	5.44	4.6	2.88	0.16	1.31	100.657		1570	39	1094	230	39	19			15	21	74
LPM-56	Laughlin Peak	igneous rock	phonolite	Potter (1988)	53.82	0.29	20.81	2.889	0.183	0.14	0.58	9.73	5.75	0.08	4.99	99.262		343	227	476	503	233	27	39	2	<10	2	150
LPM-63	Laughlin Peak	igneous rock	basalt	Potter (1988)	56.88	0.96	16	6.746	0.1	3.53	7.02	5.6	2.6	0.55	0.32	100.306		2159	47	2072	269	59	19			55	36	80
LPM-66	Laughlin Peak	igneous rock	phonolite	Potter (1988)	55.9	0.21	22.2	2.274	0.218	0.13	0.7	11.06	5.37	0.08	1.23	99.372		95	265	95	1108	308	40	18	3	<10	<10	198
LPM-80	Laughlin Peak	igneous rock	phonolite	Potter (1988)	56.93	0.22	21.92	1.833	0.167	0.09	0.66	10.49	5.52	0.06	2.09	99.98		35	249	17	880	219	31	12	6	<10	5	153
LPM-85	Laughlin Peak	igneous rock	phonolite	Potter (1988)	54.78	0.31	21.1	2.933	0.206	0.65	1.26	10.13	5.46	0.11	2.17	99.109		291	216	376	718	298	36	34	10	13	7	169
LPM-93	Laughlin Peak	igneous rock	basalt	Potter (1988)	48.62	1.72	15.82	10.75	0.18	6.17	9.96	4.74	1.66	0.91	0.92	101.45		1238	29	1568	273	56	25			51	51	76
L1	Laughlin Peak	igneous rock	Lamprophyre	Schreiner (1991)	41.18	2.09	12.58	9.84	0.13	10.42	16.54	1.88	0.8	0.74	3.75	99.95	500	816	11	916	174	16	27	190	297	75	59	61	7	2.7	2.7	11	5	<0.5	5.2	<2	<4.0	<1	31	5.7	21	50	<1	18	0.3	<5	36	<0.2	<1
L2	Laughlin Peak	igneous rock	trachyte	Schreiner (1991)	61.933	0.9	17.89	5.94	0.04	0.13	1.26	6.84	0.24	0.35	4.76	100.283	450	155	<12	216	324	44	15	146	150	45	60	61	7	3.6	6.5	18	<2	<0.2	7.2	21	<0.5	2	12	0.8	26	45	9	62	0.6	49	<20	na	<1
L5	Laughlin Peak	igneous rock	Lamprophyre	Schreiner (1991)	47.86	0.98	14.37	8.51	0.2	2.69	8.12	5.05	1.79	0.77	9.43	99.77	800	703	31	756	143	23	24	136	67	30	49	104	6	2.6	4.7	15	<2	0.6	2.2	<2	<4.0	<1	18	2.2	21	19	<1	25	0.3	<5	<30	<0.2	<1
L7	Laughlin Peak	igneous rock	trachyte	Schreiner (1991)	60.54	0.7	17.06	5.73	0.13	1.1	3.32	5.02	4.15	0.34	1.21	99.3	620	1315	130	1199	76	54	19	93	158	15	37	91	8	3.3	5	25	5	0.2	1.2	7	<0.5	3	11	1.4	19	8	<1	54	0.2	20	<20	na	<1
L24	Laughlin Peak	igneous rock	Lamprophyre	Schreiner (1991)	46.4	0.97	13.36	8.66	0.18	3.8	9.84	3.03	2.98	0.65	9.05	98.92	850	751	64	907	76	11	26	171	126	34	56	83	4	2	4.2	13	4	<0.5	4.6	<2	<4.0	1	23	2.7	17	20	<1	26	0.2	<5	<30	<0.2	<1
L25	Laughlin Peak	igneous rock	Lamprophyre	Schreiner (1991)	35.97	1.46	8.72	10.8	0.19	15.26	14.07	0.71	1.87	1.16	9.96	100.17	720	1508	49	1184	18	1	23	175	561	316	57	74	4	4.3	4.4	20.2	<2	<0.5	2.6	<2	<4.0	<1	44	5.7	11	35	<1	18	0.2	<5	58	<0.2	<1
L40	Laughlin Peak	igneous rock	trachyte	Schreiner (1991)	61.47	0.52	18.51	4.19	0.09	0.24	0.82	6.12	4.75	0.35	2.33	99.39	310	1498	160	683	287	41	16	66	31	5	8	78	6	2.9	6.3	21.5	<2	<0.2	1.4	34	<0.5	3	7	1.5	17	4	1	60	0.3	15	<20	na	1
L50	Laughlin Peak	igneous rock	phonolite	Schreiner (1991)	54.98	0.24	20.93	2.71	0.15	0.01	0.68	9.31	5	0.05	5.33	99.39	590	82	140	83	811	146	22	27	14	<1	7	106	17	6.5	32.6	84.5	<2	0.9	0.9	3	6.2	<1	<2	0.7	34	20	<1	41	0.2	<5	<30	<0.2	<1
L58	Laughlin Peak	igneous rock	Lamprophyre	Schreiner (1991)	45.21	1.04	14.98	8	0.16	7.88	7.26	4.84	2.22	0.48	7.89	99.96	560	971	46	870	180	<68	23	119	271	153	43	89	5	6.4	13	42.4	6	<0.5	1.8	<2	<4.0	2	28	7.5	20	16	<1	23	0.3	<5	39	<0.2	1
S1	Laughlin Peak	igneous rock	phonolite	Staatz (1985)	54.8	0.3	21	3.16	0.2	0.2	0.42	9.6	4.96	<0.1	4.9	99.54															50	111
S2	Laughlin Peak	igneous rock	phonolite	Staatz (1985)	53.9	0.3	21.3	3.256	0.22	0.2	0.6	10.3	4.14	<0.1	4.7	98.916															52	139
S3	Laughlin Peak	igneous rock	trachyte	Staatz (1985,#3)	61.5	0.46	18.1		0.15	0.66	1.97	7.1	3.78	0.2	2.32	96.24				1500											7	21
S4	Laughlin Peak	igneous rock	trachyte	Staatz (1985)	62.6	0.36	18.3		0.11	0.3	1.21	6.5	4.65	0.2	1.14	95.37															8	22
S5	Laughlin Peak	igneous rock	rhyodacite	Staatz (1985)	68	0.33	15.1		0.05	1.1	3.2	4	2.94	0.2	1.36	96.28															3.6	8.1
S6	Laughlin Peak	igneous rock	rhyodacite	Staatz (1985)	70.9	0.21	15.6		<0.02	0.1	1.9	4	2.64	<0.2	1.06	96.41															3.2	6.5
S7	Laughlin Peak	igneous rock	rhyodacite	Staatz (1985)	69	0.22	16		<0.02	0.3	2.47	3.7	2.83	<0.1	2.28	96.8															2.6	6.6
S8	Laughlin Peak	igneous rock	rhyodacite	Staatz (1985)	67.8	0.32	15.1			1.2	3.09	3.6	3.01	0.2	2.23	96.55															2.8	6.7
S9	Laughlin Peak	igneous rock	rhyodacite	Staatz (1985)	68.1		15.7			1.3	3.34	4	2.68	0.2	1.25	96.57															3.2	7.3
S10	Laughlin Peak	igneous rock	trachyandesite	Staatz (1985,#10)	51.9	1.06	14.6		0.13	2.6	5.57	4.3	3.73	0.4						700											4.4	8.7
S11	Laughlin Peak	igneous rock	trachyandesite	Staatz (1985,#11)	57.6	0.8	18.6		0.121038	1.5	3.39	5.6	3.56	0.5						3000											6.2	23
S12	Laughlin Peak	igneous rock	trachyandesite	Staatz (1985,#12)	55	1.02	16.1		0.16	2.8	3.68	4.4	4.2	0.55						2000											3.8	11
S13	Laughlin Peak	igneous rock	basalt	Staatz (1985)	45.6		15.1		0.18	6.86	11.4	3.1	1.06	1.1	1.79	86.19															3.5	16
28l	Laughlin Peak	carbonatite	carbonatite	Schreiner (1991)	50.89	0.28	1.72	9.68	0.32	0.47	17.09	0.01	0.06	3.3	13.48	97.3	2650	4200	41	6199	65	66	71	108	0.01	22	6	363		33	16	155	<6	0.2					15		<2		14	111	0.6				<2
30l	Laughlin Peak	carbonatite	carbonatite	Schreiner (1991)	50.78	0.28	1.13	10.18	0.39	0.27	17.88	0.01	0.02	3.92	12.69	97.55	2900	3500	31	5490	41	46	98	120	0.02	11	11	355		34	13	144	8	3					15		<2		22	120	1.3				<2
31l	Laughlin Peak	carbonatite	carbonatite	Schreiner (1991)	24.59	0.21	2.04	7.02	0.39	6.55	25.8	0.01	0.07	2.79	27.31	96.78	2350	3900	<20	8495	199	63	73	37	0.01	7	7	304		26	19	131	11	0.5					9		<2		7	148	0.7				<1
33l	Laughlin Peak	carbonatite	carbonatite	Schreiner (1991)	23.99	0.4	1.56	10.33	0.31	0.9	31.33	0.01	0.06	3.68	24.52	97.09	2350	4300	<20	6283	361	397	268	60	0.01	13	8	379		37	15	457	10	0.3					17		<2		5	224	0.7				<2
34l	Laughlin Peak	carbonatite	carbonatite	Schreiner (1991)	58.6	0.26	2.23	10.1	0.47	0.79	11.9	<0.01	0.12	4.31	9.04	97.82	2200	1400	<20	8003	465	661	120	74	<0.01	12	8	468		36	14	217	<6	0.2					20		<2		7	285	0.6				<1
37l	Laughlin Peak	carbonatite	carbonatite	Schreiner (1991)	27.26						27.85						2200	4700	<50	<5379	6	502	113	62		11	7	291		29	12	194	9	<0.5					16		<174		7	101	0.5				<2
38l	Laughlin Peak	carbonatite	carbonatite	Schreiner (1991)													2300	3100	<50	<9194	4	206	90	63		9	9	334		28	15	205	<5	<0.5					13		<0		10	99	0.8				<2
52l	Laughlin Peak	carbonatite	carbonatite	Schreiner (1991)	1.28	0.05	0.34	3.46	2.52	14.5	27.1	<0.01	0.2	1.14	37.91	88.5	230	37800	79	4006	43	203	123	50	<0.01	30	11	495		<0.5	4.8	337	62	0.6					<1		<2		7	371	0.3				<19
53l	Laughlin Peak	carbonatite	carbonatite	Schreiner (1991)	0.44	0.05	0.33	3.52	3.83	13.1	25.8	<0.01	0.3	1.45	38.43	87.25	220	40900	<20	4195	22	68	168	100	<0.01	30	11	709		<0.5	12	457	<15	0.2					5		<2		6	473	1.8				<30
57l	Laughlin Peak	carbonatite	carbonatite	Schreiner (1991)	5.7	0.05	0.46	6.84	1.78	0.91	47.7	0.11	0.8	2.71	34.22	101.28	2850	10100	<50	<1783	27	<1	323	90	<0.01	4	5	569		<0.5	81.8	151	34	<0.5					5		<377		<5	273	0.3				<5
Chico Hills(4103)	Laughlin Peak	carbonatite	carbonatite	McLemore (2015)	16	0.18	4.81	8.04	1.17	1.72	32.8	5.07	0.8	1.2		71.79		5700		2100		50	320				57	800			230	<2
10l	Laughlin Peak	mineralized	vein	Schreiner (1991)													400	600	101	376	130	74	320	42	19	<1	11	91		4.8	11	1470	22	2.9					3		<29		<5	45	1.7			<0.2	4
11l	Laughlin Peak	mineralized	vein	Schreiner (1991)													1150	595	55	15929	316	532	74	240	146	78	39	348		39	95.8	421	<11	0.2					35		29		68	338	7.7				<5
20l	Laughlin Peak	mineralized	vein	Schreiner (1991)													2200	2000	<34	7611	9	102	4175	88	149	16	28	96		75.1	185	>9000.0	75	17.9					24		59		9	83	2.8			<0.2	<11
21l	Laughlin Peak	mineralized	vein	Schreiner (1991)													730	180	15	1712	65	66	86	20	263	13	11	24		7.2	9	259	<2	<0.2					4		8		4	49	1.1			<0.2	2
35l	Laughlin Peak	mineralized	vein	Schreiner (1991)													700	890	77	862	204	55	22	59	44	4	10	61		3	10	60.1	3	<0.2					5		<2		3	51	0.9			<0.2	1
36l	Laughlin Peak	mineralized	vein	Schreiner (1991)													300	340	11	<420	42	<1	32	64	10	4	6	46		0.9	6.4	22	3	<0.5					<2		<377		6	32	0.7			<0.2	<1
2l	Laughlin Peak	mineralized	breccia	Schreiner (1991)													590	96	6	783	54	6		86	179	86	28	70		11	5	10	5	<0.5					16		18		5	25	1			<0.2	4
8l	Laughlin Peak	mineralized	breccia	Schreiner (1991)													75	290	130	73	615	105		21	49	4	6	59		1	18	89.6	<2	<0.2					1		18		2	85	1.6			<0.2	4
9l	Laughlin Peak	mineralized	breccia	Schreiner (1991)													190	240	101	153	591	90		29	27	7	7	56		1	13	117	3	<0.2					<1		21		3	50	1.4			<0.2	3
13l	Laughlin Peak	mineralized	breccia	Schreiner (1991)													500	520	38	58	1409	53	135	29	71	8	8	45		2	46.8	108	33	<0.2					9		24		12	47	4.1			<0.2	<1
14l	Laughlin Peak	mineralized	breccia	Schreiner (1991)													500	280	15	165	1529	302	115	67	54	12	13	123		3	47.1	132	36	<0.2					7		32		3	101	3.4			<0.2	6
15l	Laughlin Peak	mineralized	breccia	Schreiner (1991)													660	570	110	439	313	138	78	62	49	<9	19	83		8	34.9	102	23	1					5		<34		<5	26	3.8			<0.2	12
16l	Laughlin Peak	mineralized	breccia	Schreiner (1991)													730	450	35	328	267	488	78	134	46	10	14	185		2	13	248	65	<0.2					3		37		17	163	4.5			<0.2	17
17l	Laughlin Peak	mineralized	breccia	Schreiner (1991)													590	1600	<50	353	95	474	91	46	165	25	34	61		8	5.8	459	14	1					7		14		<5	<10	10			<0.2	8
18l	Laughlin Peak	mineralized	breccia	Schreiner (1991)													1850	4500	<50	1766	33	47		131	108	50	37	379		20	13	87.3	8	1.6					16		28		20	45	1.3			<0.2	13
19l	Laughlin Peak	mineralized	breccia	Schreiner (1991)													1850	9050	<50	1419	6	49	195	96	87	45	27	150		18	21.5	492	16	2.2					15		26		8	50	2			<0.2	10
51l	Laughlin Peak	mineralized	breccia	Schreiner (1991)													5900	3800	103	790	178	227	37	106	115	77	27	166		13	10	41.3	<2	<0.2					16		<2		14	124	2.1				<1
54l	Laughlin Peak	mineralized	breccia	Schreiner (1991)													1700	2800	61	765	71	78	40	97	160	91	25	146		11	13	50.1	10	0.8					20		18		9	53	0.9			<0.2	6
55l	Laughlin Peak	mineralized	breccia	Schreiner (1991)													925	4600	73	3441	156	304	170	131	76	354	26	2908		18	20.1	152	<2	0.2					210		32		68	118	1.5				7
29l	Laughlin Peak	mineralized	silifiedcarbonatite	Schreiner (1991)													2550	3700	65	5860	58	52	94	164	0.01	17	27	338		33	14	163	<6	0.3					16		<2		24	108	2.4				<2
32l	Laughlin Peak	mineralized	silifiedcarbonatite	Schreiner (1991)													2450	7000	64	5996	483	406	87	186	0.03	40	18	420		43	18	193	<7	0.2					16		7		31	303	3				<3
1l	Laughlin Peak	mineralized	misc	Schreiner (1991)													500	1100	<50	916	174	16	27	190	297	75	59	61		2.7	2.7	11	5	<0.5					31		21		<5	18	0.3			<0.2	<1
3l	Laughlin Peak	mineralized	misc	Schreiner (1991)													430	190	<50	<272	30	<1	11	39	5	12	12	31		0.7	3.9	6.4	5	<0.5					2		<369		<5	27	0.8			<0.2	1
4l	Laughlin Peak	mineralized	misc	Schreiner (1991)													450	130	<20	216	324	44	15	146	150	45	60	61		3.6	6.5	18							12		26		11	62	0.6				<1
5l	Laughlin Peak	mineralized	misc	Schreiner (1991)													800	1000	56	756	143	23	24	136	67	30	49	104		2.6	4.7	15	<2	0.6					18		21		<5	25	0.3			<0.2	<1
6l	Laughlin Peak	mineralized	misc	Schreiner (1991)													570	850	63	804	67	28	14	125	94	38	21	47		1.9	5.1	15	<2	<0.5					11		<2		<1	34	1			<0.2	<1
7l	Laughlin Peak	mineralized	misc	Schreiner (1991)													620	1300	48	1199	76	54	19	93	158	15	37	91		3.3	5	25	5	0.2					11		19		2	54	0.2				<1
24l	Laughlin Peak	mineralized	misc	Schreiner (1991)													850	880	77	907	76	11	26	171	126	34	56	83		2	4.2	13	4	<0.5					23		17		<5	26	0.2			<0.2	<1
25l	Laughlin Peak	mineralized	misc	Schreiner (1991)													720	2000	118	1184	18	1	23	175	561	316	57	74		4.3	4.4	20.2	<2	<0.5					44		11		<5	18	0.2			<0.2	<1
26l	Laughlin Peak	mineralized	misc	Schreiner (1991)													1050	600	63	352	88	25	11	120	60	35	24	46		1.3	5.7	15	<2	0.2					6		<2		7	41	1				2
27l	Laughlin Peak	mineralized	misc	Schreiner (1991)													730	440	47	929	74	26	9	133	74	46	34	100		1.4	5.3	14	5	<0.2					8		<2		8	41	0.6				2
40l	Laughlin Peak	mineralized	misc	Schreiner (1991)													310	1400	<20	683	287	41	16	66	31	5	8	78		2.9	6.3	21.5	<2	<0.2					7		17		4	60	0.3				1
42l	Laughlin Peak	mineralized	misc	Schreiner (1991)													300	150	<50	118	30	4	7	13	185	23	12	8		<0.5	1.8	4	<2	0.5					3		4		<5	50	24.5			<0.2	1
47l	Laughlin Peak	mineralized	misc	Schreiner (1991)													420	180	97	84	151	20	17	46	521	9	17	33		1.9	23	23.7	<2	0.2					2		13		3	41	2.5				2
50l	Laughlin Peak	mineralized	misc	Schreiner (1991)													590	140	145	83	811	146	22	27	14	<1	7	106		6.5	32.6	107	<2	0.9					<2		34		<5	41	0.2			<0.2	<1
56l	Laughlin Peak	mineralized	misc	Schreiner (1991)													310	1900	86	833	68	26	26	56	44	16	40	83		2.1	7.1	25	9	1.1					11		20		<5	65	0.5			<0.2	4
58l	Laughlin Peak	mineralized	misc	Schreiner (1991)													560	1200	75	870	180	<68	23	119	271	153	43	89		6.4	13		6	<0.5					28		20		<5	23	0.3			<0.2	1
HR2	Laughlin Peak	mineralized	vein 12, brecciated vein from dump	McLemore (2015)														1440														840																<0.4
HR7	Laughlin Peak	mineralized	pit vein 27 13,27N,26E	McLemore (2015)														183														370
HR8	Laughlin Peak	mineralized	vein 27, pit	McLemore (2015)														351	159	389	569	102									8	810
HR11	Laughlin Peak	mineralized	vein 4, sandstone from dump	McLemore (2015)																													7	0.45														<0.1
HR186	Laughlin Peak	mineralized	limonitic breccia	McLemore (2015)																																												1.3
HR215	Laughlin Peak	mineralized	float,	McLemore (2015)																													165	1.24														<0.1
HR301	Laughlin Peak	mineralized	south vein 11, sandstone	McLemore (2015)														40	72	265	305	65									4.3	26	<10	1.3														<0.1
HR302	Laughlin Peak	mineralized	vein27	McLemore (2015)														95	151	199	525	111									<3	111	0	0.625
HR305	Laughlin Peak	mineralized	vein27 pit	McLemore (2015)														575	151	293	462	173									6.5	985	0	0
HR306	Laughlin Peak	mineralized	vein27 pit	McLemore (2015)														669	151	292	450	167									7.7	1329	0	0
HR307	Laughlin Peak	mineralized	vein27 pit	McLemore (2015)														60	159	168	502	106									4.1	64	0	0
HR309	Laughlin Peak	mineralized	vein27 pit	McLemore (2015)														33	169	303	515	116									8.2		0	1.31														<0.1
HR312	Laughlin Peak	mineralized	vein27, fractured wall rock	McLemore (2015)														315	156	338	478	123									5.5	699	0	0
HR313	Laughlin Peak	mineralized	vein27, limonite clay vein	McLemore (2015)														235	194	319	272	233									12	408	0	3.13
HR314	Laughlin Peak	mineralized	vein11, footwall	McLemore (2015)														62	127	243	276	82									5.4	36	0	6.1
HR315	Laughlin Peak	mineralized	vein11	McLemore (2015)														961	130	636	334	245									9	1289	0	5														<0.1
HR316	Laughlin Peak	mineralized	vein11 trench	McLemore (2015)														69	141	303	335	98									<3	41
HR317	Laughlin Peak	mineralized	vein 7 pit, Ti	McLemore (2015)														857	92	4771	493	501									31	980	0	2.19														0.4
HR318	Laughlin Peak	mineralized	vein 7, 2nd pit, Ti	McLemore (2015)														184	111	1618	290	308									19	343	0	6.8
HR321	Laughlin Peak	mineralized	vein 11, s 314, limonite vein	McLemore (2015)														81	168	287	330	92									4.1	79	0	0
HR322	Laughlin Peak	mineralized	vein 22, sandstone	McLemore (2015)																													0	1.84														<0.1
HR324	Laughlin Peak	mineralized	vein 7 pit, brecciated vein from dump	McLemore (2015)																													0	8.75														0.1
HR334	Laughlin Peak	mineralized	trench n NW Ti	McLemore (2015)														65	143	1198	382	406									<3	41	0	2.5														0.1
HR335	Laughlin Peak	mineralized	trench n NW Ti	McLemore (2015)														210	91	1506	421	485									13		0	0														0.1
HR408	Laughlin Peak	mineralized	breccia 1,27N,25E, i	McLemore (2015)																													55	1.91														<0.1
HR415	Laughlin Peak	mineralized	breccia 3,27N,26E, dike	McLemore (2015)																													41	0.73														<0.1
HR501	Laughlin Peak	mineralized	DH1 110-110.5	McLemore (2015)																													14	0.51														0.3
HR502	Laughlin Peak	mineralized	DH1 90.9-91.5	McLemore (2015)																													14	2.17														<0.1
HR503	Laughlin Peak	mineralized	DH1 64.7-66.7	McLemore (2015)																													21	0.39														<0.1
HR504	Laughlin Peak	mineralized	DH1 48-50	McLemore (2015)																													27	2.26														0.2
HR505	Laughlin Peak	mineralized	DH1	McLemore (2015)																													21	1														0.2
HR602	Laughlin Peak	mineralized	DH2 217-217.5 ft	McLemore (2015)																													82															0.3
HR603	Laughlin Peak	mineralized	DH2 225-227	McLemore (2015)																													34															0.1
HR604	Laughlin Peak	mineralized	DH2 236-236.5	McLemore (2015)																													14															0.1
HR605	Laughlin Peak	mineralized	DH2 254-256	McLemore (2015)																													10	6.88														<0.1
HR606	Laughlin Peak	mineralized	DH2 260-264	McLemore (2015)																													<10															<0.1
HR607	Laughlin Peak	mineralized	DH2 243-245	McLemore (2015)																													14	3.13														<0.1
HR1001	Laughlin Peak	mineralized	vein 16 7 1875 FNL, 1800 FEL, pyrite in trachyandesite	McLemore (2015)																													0.21	0.42
HR1002	Laughlin Peak	mineralized	vein 16 7 1850 FEL, 725 FNL, pyrite in trachyandesite	McLemore (2015)																													<0.02	2.36
HR1003	Laughlin Peak	mineralized	vein 16 7 1850 FWL, 625 FNL, breccia	McLemore (2015)																													0.03	2.8
HR1010	Laughlin Peak	mineralized	7 425 FWL 1700 FNL, silicified trachyandesite	McLemore (2015)																													<0.02	1.8
HR1013	Laughlin Peak	mineralized	36 2300FEL 2300 FSL	McLemore (2015)																													<0.02	1.77
HR1017	Laughlin Peak	mineralized	2100 FWL 1250 FNL 6	McLemore (2015)																													<0.02	0.26
HR1018	Laughlin Peak	mineralized	w large Ti ne nw nw 12	McLemore (2015)																													<0.02	0.88
HR1028	Laughlin Peak	mineralized	2150 FWL 700 FNL 7	McLemore (2015)																													<0.02	0.73
HR1034	Laughlin Peak	mineralized		McLemore (2015)																													<0.02	1.32
HR1102	Laughlin Peak	mineralized		McLemore (2015)																													<0.02	2.54
HR1103	Laughlin Peak	mineralized		McLemore (2015)																													<0.02	0.21
HR1104	Laughlin Peak	mineralized		McLemore (2015)																													<0.02	<0.1
HR1105	Laughlin Peak	mineralized		McLemore (2015)																													<0.02	0.72
HR1106	Laughlin Peak	mineralized		McLemore (2015)																													<0.02	0.49
21	Gallinas Mountains	igneous rock	fenitized andesite dike	Schreiner (1993)	51.4	1.1	18	8.17	0.18	3.77	6.45	4.84	2.64	0.21	2.67	99.43		3700		1431			33		16	14	50	83			6.8	30	<5	<0.2					18				2	32	<5				<20
23	Gallinas Mountains	igneous rock	fenitized syenite	Schreiner (1993)	60.2	0.36	18.7	3.11	0.17	0.15	0.38	4.6	8.46	0.18	1.34	97.65		1800		749		118	30		18	1	17	51			6.4	71.3	12	<0.2					4				<1	17	<5				<20
29	Gallinas Mountains	igneous rock	fenitized gneiss	Schreiner (1993)	67.9	0.16	15.5	1.19	0.03	0.08	0.41	5.16	6.25	0.15	0.69	97.52		1800		508			27		28	3	9	15			8.8	274	<5	<0.2					2				1	10	<5				<20
36	Gallinas Mountains	igneous rock	fenitized breccia	Schreiner (1993)	63.9	0.34	11.7	2.63	0.34	0.17	4.7	3.17	5.88	0.26	4.63	97.72	395	1600		329			57		44	19	193	108			3.1	23	165	<0.2					10				7	16	<5				<20
38	Gallinas Mountains	igneous rock	fenitized breccia	Schreiner (1993)	52.4	0.73	13.2	5.08	0.46	0.32	9.42	3.86	5.62	0.69	8.5	100.28	867	2800		1104		52	39		41	21	47	144			4.7	25	73	<0.2					16				3	28	<5				<20
54	Gallinas Mountains	igneous rock	trachyte	Schreiner (1993)	66.1	0.2	17.7	2.11	0.09	0.06	0.16	6.75	5.52	0.12	0.63	99.44	140	430		107		181	42		19	2	4	30			10	63.4	9	<0.2					2				3	8	<5				<20
72	Gallinas Mountains	igneous rock	fenitized breccia	Schreiner (1993)	65.6	0.28	16.8	1.86	0.52	0.06	0.16	4.01	9.08	0.22	1.24	99.83		3300		352			187		28	5	9	37			9.8	49	27	<0.2					3				20	36	<5				<10
85	Gallinas Mountains	igneous rock	fenitized trachyte	Schreiner (1993)	68.5	0.23	16.3	1.04	0.13	0.05	0.21	6.62	4.03	0.09	0.78	97.98	602	770		247		135	54		17	3	2	11			3.8	50.5	<5	<0.2					2				2	3	<5				<20
95	Gallinas Mountains	igneous rock	trachyte	Schreiner (1993)	68.34	0.28	17.01	0.84	0.16	0.05	0.55	9.41	0.98	0.1	0.83	98.55		1700		802			52		20	3	29	35			3.7	43.1	10	<0.2					2				1	28	<5				<10
239	Gallinas Mountains	igneous rock	fenitized gneiss	Schreiner (1993)	68	0.14	13.7	2.32	0.55	0.13	1.1	3.28	6.95	0.25	1.84	98.26		2600		267			90		40	12	167	148			6.4	11.7	28	0.2					4				5	1057	22				<10
258	Gallinas Mountains	igneous rock	trachyte dike	Schreiner (1993)	60.25	0.61	17.39	5.07	0.13	0.21	0.13	8.35	2.45	0.37	2.02	96.98		1900		96			47		22	7	10	30			6.1	33	94	<0.2					8				2	6	<5				<10
GM10-6	Gallinas Mountains	igneous rock	porphrytic latite	McLemore (2010)	63.55	0.409	16.54	4.76	0.103	1.12	2.32	5.9	3.72	0.27	0.97	99.662		2360		1134		13	21		20	< 20	10	70						0.7					6				< 2		< 0.5
GM10-7	Gallinas Mountains	igneous rock	rhyolite	McLemore (2010)	74.55	0.081	13.24	1.1	0.014	0.02	0.38	4.29	4.53	0.03	0.35	98.585		327		77		82	8		< 20	< 20	< 10	90						< 0.5					< 1				3		< 0.5
GM10-8	Gallinas Mountains	igneous rock	hematitic fenite	McLemore (2010)	61.26	0.441	16.91	3.86	0.007	0.04	0.05	0.67	14.02	0.14	1.1	98.498		2072		755		76	27		< 20	< 20	10	190						1.7					3				20		1.5
GM10-9	Gallinas Mountains	igneous rock	trachyte	McLemore (2010)	65.16	0.302	17.05	3.26	0.042	0.09	0.58	5.88	4.97	0.13	1.01	98.474		1554		491		104	30		< 20	< 20	< 10	< 30						1.4					3				< 2		< 0.5
6	Gallinas Mountains	Cu-F-REE vein	carbonatized and fenitized intrusive breccia	Schreiner (1993)														8400		>2000			58		10	5	7220	411			27.2	32.4	170	3.7	124				6				9	337	12				<10
9	Gallinas Mountains	Cu-F-REE vein	carbonatized and fenitized brecciated trachyte	Schreiner (1993)														8200		876			74		8	6	11	323			8	45	54	<0.2	44				8				5	47	<5				<20
12	Gallinas Mountains	Cu-F-REE vein	brecciated sandstone	Schreiner (1993)														9000		>2000			<160		14	<1	4250	182			10.9	24.1	496	27.3	985				2				618	29700	206				<10
20	Gallinas Mountains	Cu-F-REE vein	fragments of brecciated sandstone from stockpile	Schreiner (1993)														15800		>2000			<200		11	2	5823	933			42.7	19.3	610	11.2	1039				4				1316	33400	224				<10
89	Gallinas Mountains	Cu-F-REE vein	fractured trachyte with minor breccia	Schreiner (1993)														20000		502			<350		14	8	5254	554			26	122	71	2.9	>2000				5				134	61800	893				<10
137	Gallinas Mountains	Cu-F-REE vein	brecciated sandstone	Schreiner (1993)														>20000		1009			302		51	34	1482	668			7.2	22.4	131	0.7	276				9	208000			7	166	37				<10
139	Gallinas Mountains	Cu-F-REE vein	brecciated sandstone	Schreiner (1993)														>20000		875			349		60	19	1240	355			4.2	14	378	<0.2	393				7	252800			2	157	76				<10
145	Gallinas Mountains	Cu-F-REE vein	brecciated sandstone	Schreiner (1993)														>20000		658			<600		86	28	10409	1578			14	16.2	615	22.2	1852				12				49	24500	312				<10
146	Gallinas Mountains	Cu-F-REE vein	brecciated sandstone	Schreiner (1993)														5300		235			<230		108	5	24400	4342			25	6	307	1.52opt	>2000				5				1194	228700	645				<10
147	Gallinas Mountains	Cu-F-REE vein	brecciated sandstone	Schreiner (1993)														5100		1564			<180		37	<1	89200	3424			16	2.2	264	10.1opt	>2000				2				136	370900	1200				<10
148	Gallinas Mountains	Cu-F-REE vein	brecciated sandstone	Schreiner (1993)														>20000		1126			60		162	7	10627	433			13.9	7.9	770	14.3	>2000				3				13	1578	634				<10
149	Gallinas Mountains	Cu-F-REE vein	fragments of brecciated sandstone and a few fragments of limestone from dump	Schreiner (1993)														18100		505			<220		28	6	45300	2750			16	7.8	1707	2.05opt	>2000				8				46	29300	1190				<10
150	Gallinas Mountains	Cu-F-REE vein	fragments of brecciated sandstone and a few fragments of limestone from dump	Schreiner (1993)														11300		1487			<180		22	2	88000	3541			34	8.7	531	5.75opt	>2000				11				65	98500	>2000				<10
151	Gallinas Mountains	Cu-F-REE vein	brecciated sandstone	Schreiner (1993)														2500		1801			<270		53	2	6648	670			9	9	1137	39.7	>2000				2				12	4094	714				<10
160	Gallinas Mountains	Cu-F-REE vein	brecciated sandstone and limestone	Schreiner (1993)														>20000		>2000			129		41	6	3551	204			19	63.3	289	3.1	788				4				56	575	384				<20
164	Gallinas Mountains	Cu-F-REE vein	brecciated sandstone	Schreiner (1993)														9400		471			120		116	9	127	74			8.1	19	163	<0.2	69				4	131200			6	348	12				<10
165	Gallinas Mountains	Cu-F-REE vein	brecciated sandstone	Schreiner (1993)														>20000		1903			<70		49	7	3813	453			17	90.6	293	3.2	1999				6	225600			246	8284	401				<10
166	Gallinas Mountains	Cu-F-REE vein	brecciated sandstone	Schreiner (1993)														15500		1285			<90		61	7	8774	986			14	52.7	594	13.8	1877				8	179200			50	4288	438				<10
167	Gallinas Mountains	Cu-F-REE vein	fluorite rich zone	Schreiner (1993)														>20000		>2000			95		35	12	4240	2670			33.6	47.8	246	4.6	713				4	296000			18	3260	240				<10
168	Gallinas Mountains	Cu-F-REE vein	fluorite rich zone	Schreiner (1993)														>20000		>2000			<70		12	14	2577	3337			65	69	600	<0.2	640				7	264000			10	5429	222				<10
169	Gallinas Mountains	Cu-F-REE vein	fluorite rich zone	Schreiner (1993)														>20000		>2000			<100		14	6	5174	9726			52	78.2	526	6.9	1377				5	264000			35	8144	273				<10
170	Gallinas Mountains	Cu-F-REE vein	fluorite rich zone	Schreiner (1993)														>20000		>2000			<60		11	7	2800	1935			36.5	89	307	2.5	742				3	318400			111	9219	118				<10
171	Gallinas Mountains	Cu-F-REE vein	brecciated zone in sandstone	Schreiner (1993)														2400		179			140		149	18	219	161			7.9	13	208	0.5	79				6				20	115	22				<10
172	Gallinas Mountains	Cu-F-REE vein	brecciated zone in sandstone	Schreiner (1993)														3300		308			<110		69	17	18267	3853			69	4.7	596	36.2	>2000				4				51	17100	1291				<10
173	Gallinas Mountains	Cu-F-REE vein	brecciated sandstone	Schreiner (1993)														7000		295			82		61	8	365	154			10	6.8	25	2.6	292				3				25	301	132				<10
174	Gallinas Mountains	Cu-F-REE vein	fractured sandstone with minor breccia	Schreiner (1993)														2400		225			119		69	44	540	1115			6.6	12.2	11	1.3	232				10				35	296	45				<10
175	Gallinas Mountains	Cu-F-REE vein	brecciated sandstone	Schreiner (1993)														5300		289			105		79	13	19600	2001			26.8	16.4	99	25.8	>2000				6				16	1094	1179				<10
176	Gallinas Mountains	Cu-F-REE vein	brecciated sandstone	Schreiner (1993)														12700		794			<140		28	2	18118	189			78.9	60.6	67	13.6	>2000				2				262	21400	>2000				<10
177	Gallinas Mountains	Cu-F-REE vein	brecciated sandstone	Schreiner (1993)														7500		1003			117		31	12	1297	317			15	24.7	20	6	660				6				68	446	172				<10
179	Gallinas Mountains	Cu-F-REE vein	brecciated sandstone	Schreiner (1993)														18700		1331			190		42	23	1749	300			15	50	76	0.9	284				8				76	266	88				<10
183	Gallinas Mountains	Cu-F-REE vein	brecciated sandstone	Schreiner (1993)														>20000		>2000			<130		18	4	1042	792			19.6	85.8	250	<0.2	266				3				78	14200	141				<10
184	Gallinas Mountains	Cu-F-REE vein	brecciated sandstone	Schreiner (1993)														>20000		1140			<120		14	6	7297	1259			17.9	10	920	9.4	>2000				5				32	14300	1262				<10
208	Gallinas Mountains	Cu-F-REE vein	fragments of brecciated sandstone	Schreiner (1993)														>20000		>2000			148		17	3	196	40			9.4	37.8	107	<0.2	25				2				14	411	<5				<10
209	Gallinas Mountains	Cu-F-REE vein	brecciated sandstone	Schreiner (1993)														>20000		1657			209		54	32	875	827			10.9	93	102	<0.2	206				7				96	506	58				<10
210	Gallinas Mountains	Cu-F-REE vein	fractured and brecciated sandstone	Schreiner (1993)														9400		1461			117		100	12	376	113			9.8	22.1	31	6	75				4				19	322	15				<10
211	Gallinas Mountains	Cu-F-REE vein	brecciated sandstone-dolomite contact	Schreiner (1993)														10400		1394			154		69	9	222	105			50	24.1	25	<0.2	40				5				13	190	10				<10
212	Gallinas Mountains	Cu-F-REE vein	brecciated sandstone-dolomite contact	Schreiner (1993)														>20000		>2000			250		17	8	1073	128			23	39.7	<5	<0.2	200				6				5	731	71				<10
214	Gallinas Mountains	Cu-F-REE vein	brecciated sandstone	Schreiner (1993)														1600		708			20		81	15	37000	5717			75	8.5	61	2.38opt	>2000				6				8	1062	1467				<10
215	Gallinas Mountains	Cu-F-REE vein	brecciated sandstone	Schreiner (1993)														250		115			71		34	10	10471	841			5.4	2.9	19	36.8	1261				10				2	28	408				<10
216	Gallinas Mountains	Cu-F-REE vein	fractured sandstone	Schreiner (1993)														140		155			74		28	11	4387	549			3	3.1	12	9.2	746				11				4	23	208				<10
226	Gallinas Mountains	Cu-F-REE vein	fractured and brecciated sandstone	Schreiner (1993)														1300		127			54		82	14	270	588			3.8	6.9	7	0.9	66				5				16	796	32				<10
227	Gallinas Mountains	Cu-F-REE vein	fractured and brecciated sandstone	Schreiner (1993)														5700		324			<150		58	13	5962	2778			22.5	13.1	27	13.1	1473				9				73	9815	449				<10
228	Gallinas Mountains	Cu-F-REE vein	brecciated sandstone	Schreiner (1993)														5600		154			<150		36	3	13067	2128			70	8.5	67	3opt	>2000				3				1198	210600	>2000				<10
229	Gallinas Mountains	Cu-F-REE vein	brecciated sandstone	Schreiner (1993)														800		152			<120		62	14	1876	4716			13.1	7.9	14	4.5	461				6				41	5012	94				<10
230	Gallinas Mountains	Cu-F-REE vein	brecciated sandstone	Schreiner (1993)														4400		317			54		<150	8	15173	2954			195	12	<58	2.44opt	>9000				<10				298	93400	2950				35
231	Gallinas Mountains	Cu-F-REE vein	brecciated sandstone	Schreiner (1993)														690		172			59		49	26	728	397			4.5	10.3	30	2.6	184				29				10	747	59				<10
232	Gallinas Mountains	Cu-F-REE vein	fragments of brecciated sandstone from dump	Schreiner (1993)														5800		318			<110		64	27	3798	6914			17	14.7	31	9.4	>2000				13				486	27600	381				<10
233	Gallinas Mountains	Cu-F-REE vein	brecciated sandstone	Schreiner (1993)														19400		453			120		53	18	150	174			23.6	15.1	24	<0.2	48				5				13	115	26				<10
234	Gallinas Mountains	Cu-F-REE vein	brecciated sandstone	Schreiner (1993)														79000		942			173		280	17	73	462			19	31	<19	0.6	35				26				26	131	9.5				12
235	Gallinas Mountains	Cu-F-REE vein	brecciated sandstone	Schreiner (1993)														5000		230			92		53	20	201	303			6.2	10	7	1.3	58				8				5	378	20				<10
236	Gallinas Mountains	Cu-F-REE vein	brecciated sandstone	Schreiner (1993)														16100		709			271		45	20	29	481			32.7	50	5	<0.2	12				7				29	125	8				<10
237	Gallinas Mountains	Cu-F-REE vein	fragments of brecciated sandstone	Schreiner (1993)														26900		750			153		130	8	135	65			24	16	<12	<0.5	143				<5				15	753	46.8				<10
238	Gallinas Mountains	Cu-F-REE vein	fragments of conglomerate from dump	Schreiner (1993)														>20000		>2000			79		17	10	1832	158			28.5	68.5	15	<0.2	492				4				11	752	163				<10
252	Gallinas Mountains	Cu-F-REE vein	fenitized and fractured trachyte dike	Schreiner (1993)														830		76			110		25	3	75	111			16.6	97.6	17	<0.2	37				<1				153	1078	18				<10
253	Gallinas Mountains	Cu-F-REE vein	fenitized and fractured trachyte dike	Schreiner (1993)														400		59			41		12	2	158	116			19	77	8	<0.2	71				<1				8	764	13				<10
254	Gallinas Mountains	Cu-F-REE vein	fragments of brecciated sandstone from dump	Schreiner (1993)														4500		577			<90		52	44	23200	1782			36.4	4.2	93	21	1571				22				76	12900	484				<10
255	Gallinas Mountains	Cu-F-REE vein	brecciated sandstone	Schreiner (1993)														4100		2091			43		<85	6	4727	249			19	10	170	13	1270				<5				34	30000	218				20
256	Gallinas Mountains	Cu-F-REE vein	brecciated sandstone	Schreiner (1993)														1700		287			<140		51	6	1305	416			13.8	9.2	149	9	1688				2				56	9077	304				<10
257	Gallinas Mountains	Cu-F-REE vein	fragments of sandstone and brecciated sandstone from dump	Schreiner (1993)														5130		378			49		74	13	903	194			7	17	94	3.1	386				<5				90	1987	73.1				15
293	Gallinas Mountains	Cu-F-REE vein	Rio Tinto breccia	Korzeb and Kness (1992)																							1679	3449					39											331
294	Gallinas Mountains	Cu-F-REE vein	Rio Tinto breccia	Korzeb and Kness (1992)																							5786	142					170	8										10000
295	Gallinas Mountains	Cu-F-REE vein	Red Cloud fluorite breccia	Korzeb and Kness (1992)																							21	219					12											60
296	Gallinas Mountains	Cu-F-REE vein	Red Cloud fluorite breccia	Korzeb and Kness (1992)																							374	169						11										1186
297	Gallinas Mountains	Cu-F-REE vein	Red Cloud copper	Korzeb and Kness (1992)																							15105	10200						2.08										10000
153	Gallinas Mountains	REE-F vein	brecciated sandstone	Schreiner (1993)														4700		213			68		152	10	16	30			10.8	10	<5	<0.2	<5				4				123	26	<5				<10
258	Gallinas Mountains	REE-F vein	trachyte dike	Schreiner (1993)														1900		96			47		22	7	10	30			6.1	33	94	<0.2	24				8				2	6	<5				<10
10	Gallinas Mountains	REE-F vein	brecciated sandstone	Schreiner (1993)														>20000		>2000			74		63	6	81	89			4.5	5.5	30	<0.2	34				2				194	584	9				<10
11	Gallinas Mountains	REE-F vein	fractured sandstone	Schreiner (1993)														1700		378			28		97	10	62	100			2.4	4.8	35	0.6	21				4				22	350	5				<10
13	Gallinas Mountains	REE-F vein	intrusive breccia	Schreiner (1993)														18700		1175			66		10	5	415	911			10.5	6.4	135	<0.2	42				3				364	1869	10				<10
14	Gallinas Mountains	REE-F vein	intrusive breccia	Schreiner (1993)														>20000		>2000			134		16	10	158	529			10.2	9.2	28	<0.2	40				4				44	205	8				<10
15	Gallinas Mountains	REE-F vein	intrusive breccia	Schreiner (1993)														17100		>2000			106		11	6	263	297			13.3	5.9	19	<0.2	19				8				11	181	<5				<10
16	Gallinas Mountains	REE-F vein	brecciated limestone bed	Schreiner (1993)														8200		463			92		11	5	19	103			4	5.9	32	0.2	8				2				37	81	<5				<10
17	Gallinas Mountains	REE-F vein	brecciated limestone bed	Schreiner (1993)														7300		1335			61		6	14	108	547			7.7	20.5	63	0.9	116				14				93	799	17				<10
18	Gallinas Mountains	REE-F vein	intrusive breccia	Schreiner (1993)														14500		683			79		8	5	32	239			5.9	3.2	33	<0.2	20				3				22	321	<5				<10
19	Gallinas Mountains	REE-F vein	intrusive breccia	Schreiner (1993)														>20000		973			126		12	9	63	201			10	14.4	80	<0.2	16				5				24	519	<5				<10
24	Gallinas Mountains	REE-F vein	brecciated trachyte dike in contact with brecciated limestone	Schreiner (1993)														4000		224			101		12	3	18	123			14	49	41	<0.2	16				2				41	503	6				<20
25	Gallinas Mountains	REE-F vein	brecciated limestone in contact with brecciated sandstone and trachyte dike (sample 24)	Schreiner (1993)														16200		380			418		13	10	29	321			20	20	19	<0.2	23				6				81	711	17				<20
46	Gallinas Mountains	REE-F vein	brecciated zone in trachyte	Schreiner (1993)														>20000		1369			106		22	4	18	53			14	27.8	21	<0.2	9				2				13	63	<5				<10
49	Gallinas Mountains	REE-F vein	fragments of brecciated sandstone and trachyte from dump	Schreiner (1993)														2900		530			64		62	14	22	156			7	18	5	<0.5	3.8				<5				14	64	2.7				<10
50	Gallinas Mountains	REE-F vein	fragments of brecciated sandstone from dump	Schreiner (1993)														14400		848			87		28	6	27	87			9.3	10.3	<5	<0.2	14				4				7	63	<5				<10
51	Gallinas Mountains	REE-F vein	fragments of brecciated trachyte from dump	Schreiner (1993)														11000		861			162		21	4	9	35			18	16	<5	<0.2	<5				2				6	84	<5				<10
52	Gallinas Mountains	REE-F vein	fragments of brecciated sandstone from dump	Schreiner (1993)														6200		1797			57		18	4	9	88			6.9	19	<5	<0.2	10				5				5	33	<5				<20
53	Gallinas Mountains	REE-F vein	fragments of brecciated sandstone from dump	Schreiner (1993)														16900		1316			117		49	4	20	20			14.7	12.4	14	<0.2	11				3				7	70	<5				<10
90	Gallinas Mountains	REE-F vein	fragments of brecciated trachyte from dump	Schreiner (1993)														6500		524			<370		17	7	206	174			13	69.7	18	<0.2	83				3				25	3441	42				<10
91	Gallinas Mountains	REE-F vein	fragment of brecciated sandstone in float	Schreiner (1993)														970		534			56		26	15	19	21			5.7	37.2	<5	<0.2	6				4				<1	79	<5				<10
92	Gallinas Mountains	REE-F vein	outcrop of fractured trachyte with minor breccia	Schreiner (1993)														3300		190			97		13	2	10	23			6.2	47.3	13	<0.2	<5				<1				4	29	<5				<10
93	Gallinas Mountains	REE-F vein	outcrop of brecciated zone in trachyte	Schreiner (1993)														2900		309			80		11	2	21	77			7.6	37.3	55	<0.2	8				4				4	67	<5				<10
94	Gallinas Mountains	REE-F vein	outcrop of brecciated zone in trachyte	Schreiner (1993)														2800		178			68		19	4	17	115			7.4	45.4	15	<0.2	<5				3				26	43	<5				<10
95	Gallinas Mountains	REE-F vein	fragments of trachyte from dump	Schreiner (1993)														1700		802			52		20	3	29	35			3.7	43.1	10	<0.2	<5				2				1	28	<5				<10
105	Gallinas Mountains	REE-F vein	brecciated trachyte	Schreiner (1993)														16000		1036			402		43	4	135	51			14	110	49	<0.2	13				2				113	86	17				<10
106	Gallinas Mountains	REE-F vein	fractured and altered trachyte	Schreiner (1993)														2100		366			122		49	1	39	5			8.1	63.6	32	<0.2	12				<1				5	12	9				<10
107	Gallinas Mountains	REE-F vein	brecciated trachyte sandstone contact	Schreiner (1993)														3100		199			79		124	14	40	83			4.4	9	116	2.5	<5				7				7	34	<5				<10
108	Gallinas Mountains	REE-F vein	brecciated zone in sandstone	Schreiner (1993)														>20000		528			315		28	17	14	203			5.7	40	145	<0.2	<5				8				7	31	<5				<20
109	Gallinas Mountains	REE-F vein	brecciated zone in sandstone	Schreiner (1993)														19100		384			95		30	15	3	140			4.9	23	43	<0.2	7				8				6	39	<5				<20
110	Gallinas Mountains	REE-F vein	brecciated sandstone	Schreiner (1993)														1800		333			57		33	8	8	52			2.1	6.2	<5	0.5	14				5	240000			3	18	<5				<20
111	Gallinas Mountains	REE-F vein	brecciated sandstone	Schreiner (1993)														10200		430			79		54	7	109	26			5.5	20	<5	<0.2	50				5	62500			11	42	20				<20
112	Gallinas Mountains	REE-F vein	brecciated sandstone	Schreiner (1993)														20000		1056			129		45	9	26	54			12	25	6	<0.2	5				4	135000			14	59	<5				<20
113	Gallinas Mountains	REE-F vein	brecciated sandstone	Schreiner (1993)														14900		385			64		48	12	16	109			4.9	21	7	<0.2	12				6	116000			14	32	<5				<20
114	Gallinas Mountains	REE-F vein	brecciated sandstone	Schreiner (1993)														8700		342			75		31	11	12	99			4.3	13	<5	<0.2	<5				5	145000			8	21	<5				<20
115	Gallinas Mountains	REE-F vein	brecciated sandstone	Schreiner (1993)														>20000		1836			83		21	5	65	51			5.6	26	12	<0.2	15				3	245000			16	80	7				<20
116	Gallinas Mountains	REE-F vein	brecciated sandstone	Schreiner (1993)														>20000		1900			89		26	12	87	117			18	28	29	<0.2	7				6	202500			18	113	<5				<20
117	Gallinas Mountains	REE-F vein	brecciated sandstone	Schreiner (1993)														7100		639			66		43	14	32	93			6.9	11	51	<0.2	5				7	107500			8	76	<5				<20
118	Gallinas Mountains	REE-F vein	brecciated sandstone	Schreiner (1993)														>20000		>2000			112		18	15	196	175			19	38	45	<0.2	27				6	263500			32	236	18				<20
119	Gallinas Mountains	REE-F vein	brecciated sandstone	Schreiner (1993)														9200		>2000			45		47	20	126	166			5.5	18	28	<0.2	12				10	79000			23	53	<5				<20
120	Gallinas Mountains	REE-F vein	brecciated sandstone	Schreiner (1993)														16100		>2000			80		27	20	9	125			4.3	28	49	<0.2	<5				11	184800			9	47	<5				<20
121	Gallinas Mountains	REE-F vein	brecciated sandstone	Schreiner (1993)														>20000		>2000			108		16	13	166	182			7.1	39	94	<0.2	14				5	306500			19	168	<5				<20
122	Gallinas Mountains	REE-F vein	brecciated sandstone	Schreiner (1993)														>20000		1557			93		17	9	31	90			7.4	21	22	<0.2	<5				5	295000			7	95	<5				<20
123	Gallinas Mountains	REE-F vein	brecciated sandstone	Schreiner (1993)														13300		>2000			54		23	18	758	858			6.3	18	404	0.2	328				11	168500			15	84	158				<20
124	Gallinas Mountains	REE-F vein	brecciated sandstone	Schreiner (1993)														>20000		1653			75		23	19	39	268			12	30	66	<0.2	17				8	219000			26	228	<5				<20
125	Gallinas Mountains	REE-F vein	brecciated sandstone	Schreiner (1993)														11000		795			105		32	12	17	96			5.7	15	78	<0.2	10				5	168500			8	35	<5				<20
126	Gallinas Mountains	REE-F vein	brecciated sandstone	Schreiner (1993)														3000		365			85		45	19	16	182			4.2	12	98	0.5	44				10	85500			10	27	13				<20
127	Gallinas Mountains	REE-F vein	fractured sandstone	Schreiner (1993)														740		193			88		48	18	18	74			3.2	8.6	17	0.5	15				5	47800			6	27	<5				<20
128	Gallinas Mountains	REE-F vein	brecciated sandstone	Schreiner (1993)														>20000		>2000			74		26	12	299	130			7.2	24	755	<0.2	189				7	158000			18	66	30				<20
129	Gallinas Mountains	REE-F vein	fractured sandstone	Schreiner (1993)														840		>2000			30		37	29	11	241			3.1	10	30	0.2	23				8	44500			1	9	<5				<20
130	Gallinas Mountains	REE-F vein	brecciated sandstone	Schreiner (1993)														>20000		1758			96		23	8	22	75			13	30	75	<0.2	17				5	219000			14	62	<5				<20
131	Gallinas Mountains	REE-F vein	brecciated sandstone	Schreiner (1993)														7800		1080			90		32	14	5	183			5.8	14	28	<0.2	6				6	164000			9	50	<5				<20
132	Gallinas Mountains	REE-F vein	brecciated sandstone	Schreiner (1993)														18800		1947			112		17	7	108	110			12	23	<5	<0.2	14				4	317500			29	154	6				<20
133	Gallinas Mountains	REE-F vein	brecciated sandstone	Schreiner (1993)														>20000		1153			88		34	5	19	2			65	41	10	<0.2	<5				3	184800			4	58	<5				<20
134	Gallinas Mountains	REE-F vein	brecciated sandstone	Schreiner (1993)														>20000		1222			84		27	7	138	90			5.1	24	21	<0.2	31				3	254000			15	74	18				<20
135	Gallinas Mountains	REE-F vein	brecciated sandstone	Schreiner (1993)														>20000		911			390		30	27	270	360			7.1	26	72	<0.2	77				10	160000			7	127	8				<10
136	Gallinas Mountains	REE-F vein	brecciated sandstone	Schreiner (1993)														11400		436			333		45	27	405	369			4.9	13	85	<0.2	83				10	85600			5	71	7				<10
138	Gallinas Mountains	REE-F vein	brecciated sandstone	Schreiner (1993)														11800		631			331		60	26	435	579			3.1	11.7	157	1.1	183				10	147200			5	95	18				<10
140	Gallinas Mountains	REE-F vein	brecciated sandstone	Schreiner (1993)														16000		687			229		73	21	824	247			4.2	10.8	367	1.2	265				8	179200			4	112	14				<10
141	Gallinas Mountains	REE-F vein	brecciated sandstone	Schreiner (1993)														8900		460			171		91	23	423	192			3	10	329	1	210				9	121600			3	129	25				<10
142	Gallinas Mountains	REE-F vein	brecciated sandstone	Schreiner (1993)														17400		481			356		38	30	64	410			18.2	12.5	96	<0.2	129				9	35600			14	405	8				<10
143	Gallinas Mountains	REE-F vein	brecciated sandstone	Schreiner (1993)														>20000		553			416		62	44	186	423			3.6	27	118	<0.2	50				15	13500			22	1711	7				<10
144	Gallinas Mountains	REE-F vein	brecciated sandstone	Schreiner (1993)														4100		377			<160		61	17	727	180			4.1	6.7	130	1.4	638				8	26000			6	2151	43				<10
152	Gallinas Mountains	REE-F vein	fractured sandstone with minor breccia	Schreiner (1993)														5000		1827			110		18	3	282	30			12.3	47.4	79	2.5	39				2				69	55	10				12
154	Gallinas Mountains	REE-F vein	brecciated limestone bed	Schreiner (1993)														>20000		1483			84		11	8	99	152			6.7	68	29	<0.2	<5				3				5	406	<5				<20
155	Gallinas Mountains	REE-F vein	brecciated limestone bed	Schreiner (1993)														3300		358			75		57	15	73	87			4.2	6.9	45	0.3	33				6				6	236	<5				<20
156	Gallinas Mountains	REE-F vein	brecciated zone in sandstone	Schreiner (1993)														13500		510			218		39	18	228	225			6.9	10	21	<0.2	47				6				17	52	8				<20
157	Gallinas Mountains	REE-F vein	fragments of brecciated sandstone and limestone from dump	Schreiner (1993)														>20000		1052			90		24	10	211	164			4.6	21	<5	<0.2	8				5				7	85	<5				<20
158	Gallinas Mountains	REE-F vein	brecciated sandstone-limestone contact	Schreiner (1993)														>20000		1036			113		19	7	237	96			2.9	27	42	<0.2	17				3				5	88	10				<20
159	Gallinas Mountains	REE-F vein	brecciated sandstone	Schreiner (1993)														>20000		1085			97		32	11	393	194			7.1	49	14	<0.2	46				4				27	82	16				<20
161	Gallinas Mountains	REE-F vein	brecciated zone in sandstone	Schreiner (1993)														>20000		1111			384		37	28	216	328			8.9	123	74	<0.2	7				7				178	409	8				<10
162	Gallinas Mountains	REE-F vein	fragments of brecciated sandstone from dump	Schreiner (1993)														>20000		980			399		10	4	575	234			1.6	19	29	<0.2	155				1				58	294	22				<10
163	Gallinas Mountains	REE-F vein	fragments of brecciated sandstone from dump	Schreiner (1993)														>20000		941			212		68	3	448	400			2.6	15	74	<0.2	420				1				58	1680	213				<10
178	Gallinas Mountains	REE-F vein	brecciated sandstone	Schreiner (1993)														>20000		>2000			<100		60	6	660	726			37.6	77.3	150	<0.2	264				4				246	13800	89				<10
180	Gallinas Mountains	REE-F vein	brecciated sandstone	Schreiner (1993)														>20000		915			144		12	5	423	80			19	150	66	<0.2	43				3				7	220	51				<10
181	Gallinas Mountains	REE-F vein	brecciated sandstone	Schreiner (1993)														>20000		>2000			168		34	6	314	48			16	48.8	25	<0.2	80				3				43	247	18				<10
182	Gallinas Mountains	REE-F vein	fragments of brecciated limestone	Schreiner (1993)														3300		426			57		7	8	313	160			5	7.3	23	0.5	65				5				6	125	18				<10
185	Gallinas Mountains	REE-F vein	fractured sandstone with minor breccia	Schreiner (1993)														4000		1541			197		20	26	548	393			9.2	17.4	167	1.5	162				8				16	72	55				<10
186	Gallinas Mountains	REE-F vein	brecciated sandstone	Schreiner (1993)														>20000		1141			175		31	5	570	237			10.9	55	107	<0.2	180				2				15	510	88				<10
187	Gallinas Mountains	REE-F vein	brecciated sandstone	Schreiner (1993)														>20000		>2000			183		8	2	563	42			10	40	15	<0.2	101				2				3	1546	19				<10
188	Gallinas Mountains	REE-F vein	brecciated sandstone	Schreiner (1993)														>20000		>2000			<200		45	7	884	324			<20	93.5	57	<0.2	385				4				50	6457	33				<10
189	Gallinas Mountains	REE-F vein	fluorite, barite, quartz rich zone	Schreiner (1993)														>20000		>2000			97		48	6	42	103			4.4	53.1	<5	<0.2	<5				2	116000			12	86	<5				<20
190	Gallinas Mountains	REE-F vein	brecciated sandstone	Schreiner (1993)														>20000		>2000			99		39	7	30	85			7.2	46	<5	<0.2	<5				3	156500			9	93	<5				<20
191	Gallinas Mountains	REE-F vein	brecciated sandstone	Schreiner (1993)														9200		634			74		46	11	21	100			3.4	12	13	<0.2	15				4	103500			14	29	<5				<20
192	Gallinas Mountains	REE-F vein	brecciated sandstone	Schreiner (1993)														6700		777			75		39	23	52	235			7	11	9	<0.2	28				15	46000			20	52	9				<20
193	Gallinas Mountains	REE-F vein	brecciated sandstone	Schreiner (1993)														>20000		1579			130		4	3	7	38			3.6	16	<5	<0.2	<5				2	385000			6	78	<5				<20
194	Gallinas Mountains	REE-F vein	brecciated sandstone	Schreiner (1993)														>20000		1648			131		13	8	14	156			6.4	29	<5	<0.2	<5				3	355000			22	80	<5				<20
195	Gallinas Mountains	REE-F vein	brecciated sandstone	Schreiner (1993)														15100		737			116		34	5	10	34			22	45	<5	<0.2	<5				3	235000			20	48	<5				<20
196	Gallinas Mountains	REE-F vein	brecciated sandstone	Schreiner (1993)														3100		263			69		59	15	42	86			3.7	8.5	14	<0.2	16				5	62500			6	43	<5				<20
197	Gallinas Mountains	REE-F vein	brecciated sandstone	Schreiner (1993)														>20000		1437			128		24	8	17	61			14	25	23	<0.2	<5				4	245000			9	84	<5				<20
198	Gallinas Mountains	REE-F vein	brecciated sandstone	Schreiner (1993)														1500		269			77		36	17	18	97			2	8	53	0.3	24				6	92300			6	31	<5				<20
199	Gallinas Mountains	REE-F vein	brecciated sandstone	Schreiner (1993)														>20000		1744			134		8	3	4	41			21	12	6	<0.2	<5				2	370000			6	64	<5				<20
200	Gallinas Mountains	REE-F vein	fragments of brecciated sandstone from dump	Schreiner (1993)														11200		1130			85		44	6	7	43			6	15	20	<0.2	25				4	159500			7	34	<5				<20
201	Gallinas Mountains	REE-F vein	brecciated sandstone	Schreiner (1993)														>20000		1232			106		23	4	19	25			9.1	43	<5	<0.2	<5				3	227000			29	99	<5				<20
202	Gallinas Mountains	REE-F vein	brecciated sandstone	Schreiner (1993)														>20000		>2000			92		13	3	7	9			10	28	8	<0.2	<5				2	306500			68	57	<5				<20
203	Gallinas Mountains	REE-F vein	brecciated sandstone	Schreiner (1993)														3000		215			34		70	11	13	34			3.8	8	<5	<0.2	8				5	38000			13	23	<5				<20
204	Gallinas Mountains	REE-F vein	brecciated sandstone	Schreiner (1993)														12700		347			62		42	9	13	39			6.7	19	15	<0.2	7				5	88500			8	41	<5				<20
205	Gallinas Mountains	REE-F vein	brecciated sandstone	Schreiner (1993)														4500		236			221		43	7	45	211			16.6	59	25	<0.2	<5				3				24	41	<5				<10
206	Gallinas Mountains	REE-F vein	brecciated sandstone and conglomeratic sandstone	Schreiner (1993)														>20000		588			501		82	28	230	690			38	30	48	<0.2	22				9				9	331	18				<10
207	Gallinas Mountains	REE-F vein	brecciated sandstone	Schreiner (1993)														3500		168			162		113	10	22	63			3.7	6.2	28	0.6	<5				3				16	30	<5				<10
213	Gallinas Mountains	REE-F vein	brecciated sandstone	Schreiner (1993)														1500		592			115		28	10	186	126			4	14	23	0.7	54				10				3	93	10				<10
217	Gallinas Mountains	REE-F vein	fragments of vuggy trachyte	Schreiner (1993)														800		976			42		32	9	110	61			7	30	15	<0.2	34				3				2	18	<5				<10
218	Gallinas Mountains	REE-F vein	brecciated sandstone	Schreiner (1993)														17300		689			203		36	7	606	578			7.7	52.4	34	1.9	248				3				74	158	47				<10
219	Gallinas Mountains	REE-F vein	brecciated sandstone	Schreiner (1993)														14800		1427			<150		39	5	606	241			16	28.6	40	1.9	688				3				511	16800	109				<10
220	Gallinas Mountains	REE-F vein	brecciated sandstone	Schreiner (1993)														2400		357			<110		39	7	957	166			9	12.5	73	4.1	434				9				30	3561	162				<10
221	Gallinas Mountains	REE-F vein	fragments of brecciated sandstone from dump	Schreiner (1993)														59100		>2000			149		280	17	175	228			9	52.4	27	5.3	80.5				12				22	70	22.9				12
222	Gallinas Mountains	REE-F vein	fractured and brecciated siltstone	Schreiner (1993)														2000		153			155		15	4	84	36			18	77.5	18	<0.2	12				2				6	38	<5				<10
223	Gallinas Mountains	REE-F vein	brecciated siltstone and sandstone	Schreiner (1993)														690		94			96		10	2	12	42			22	90.7	28	<0.2	<5				<1				2	86	<5				<10
224	Gallinas Mountains	REE-F vein	breccia zone in sandstone	Schreiner (1993)														16700		1073			263		39	42	533	694			8.6	27.7	47	0.7	94				8				30	116	35				<10
225	Gallinas Mountains	REE-F vein	breccia zone in sandstone	Schreiner (1993)														5700		410			179		46	6	54	61			4.4	17.6	7	<0.2	<5				2				5	41	<5				<10
239	Gallinas Mountains	REE-F vein	fenitized gneissic granite	Schreiner (1993)														2600		267			90		40	12	167	148			6.4	11.7	28	0.2	49				4				5	1057	22				<10
240	Gallinas Mountains	REE-F vein	trachyte dike-gneissic granite contact	Schreiner (1993)														3200		341			75		34	10	156	133			9.7	50.2	22	<0.2	62				6				9	178	24				<10
241	Gallinas Mountains	REE-F vein	calcite vein in sandstone	Schreiner (1993)														<20		608			3		2	1	6	45			<1	<0.5	<5	0.3	<5				1				<1	3	<5				<10
242	Gallinas Mountains	REE-F vein	fragments of sandstone	Schreiner (1993)														640		131			15		12	6	8	8			<1	2.6	9	0.4	<5				2				<1	5	<5				<10
243	Gallinas Mountains	REE-F vein	fractured sandstone	Schreiner (1993)														440		282			50		19	19	543	181			2.4	3.8	36	1.9	225				19				5	241	74				<10
244	Gallinas Mountains	REE-F vein	fractured sandstone with minor breccia	Schreiner (1993)														120		13			49		35	9	173	44			2	7.8	10	0.7	69				4				2	12	23				<10
245	Gallinas Mountains	REE-F vein	brecciated sandstone	Schreiner (1993)														180		521			45		43	5	171	24			1.7	9.2	7	0.9	54				2				2	26	21				<10
246	Gallinas Mountains	REE-F vein	fractured sandstone with minor breccia	Schreiner (1993)														2300		177			154		61	17	222	208			3	16	61	0.9	59				3				5	69	19				<10
247	Gallinas Mountains	REE-F vein	brecciated sandstone	Schreiner (1993)														16700		345			80		46	31	311	182			12.3	67.1	41	<0.2	142				23				33	440	18				<10
248	Gallinas Mountains	REE-F vein	brecciated sandstone	Schreiner (1993)														3400		331			95		52	32	148	231			9.1	28.8	30	<0.2	101				14				35	99	20				<10
249	Gallinas Mountains	REE-F vein	brecciated sandstone	Schreiner (1993)														18200		708			142		51	10	678	624			41.8	38.3	80	<0.2	114				6				27	148	11				<10
250	Gallinas Mountains	REE-F vein	brecciated sandstone	Schreiner (1993)														>20000		1008			81		56	48	594	1463			24.8	29.4	29	<0.2	106				9				28	171	16				<10
251	Gallinas Mountains	REE-F vein	brecciated sandstone	Schreiner (1993)														>20000		>2000			76		23	16	529	766			50.7	52.9	63	<0.2	54				13				13	200	16				<10
GM-09-LC-3	Gallinas Mountains	REE-F vein	fluorite breccia	McLemore (2010)																502		32	215		74	<10	43	68			<20	25			20				<10				52	70					17
4088	Gallinas Mountains	REE-F vein		McLemore (2010)																			186				60																	280
4089	Gallinas Mountains	REE-F vein		McLemore (2010)																			286				130																	350
4090	Gallinas Mountains	REE-F vein		McLemore (2010)																			310				290																	2240
4091	Gallinas Mountains	REE-F vein		McLemore (2010)																			46				40																	80
4092	Gallinas Mountains	REE-F vein		McLemore (2010)																			752				102																	430
4093	Gallinas Mountains	REE-F vein		McLemore (2010)																			181				70																	110
1	Gallinas Mountains	breccia pipe	fenitized intrusive breccia	Schreiner (1993)														>20000		1126			59		11	3	1266	309			26.5	28.1	174	0.2	50				3				6	559	7				<10
2	Gallinas Mountains	breccia pipe	carbonatized and fenitized intrusive breccia	Schreiner (1993)														4900		467			109		26	9	301	398			6.5	22	139	0.5	121				4				7	141	<5				<20
3	Gallinas Mountains	breccia pipe	fenitized intrusive breccia	Schreiner (1993)														13000		966			44		19	6	223	1330			9.2	38.2	222	1	123				6				8	318	9				<10
4	Gallinas Mountains	breccia pipe	fenitized intrusive breccia	Schreiner (1993)														15600		1174			54		14	3	3121	232			18.9	25.8	175	3.5	70				3				11	367	10				<10
5	Gallinas Mountains	breccia pipe	fenitized intrusive breccia	Schreiner (1993)														10700		987			68		24	7	559	698			11.7	29.1	117	2.5	97				4				6	278	<5				<10
7	Gallinas Mountains	breccia pipe	fenitized intrusive breccia	Schreiner (1993)														6100		943			113		13	5	14	279			14	67.5	37	<0.2	94				5				8	68	<5				<20
8	Gallinas Mountains	breccia pipe	carbonatized and fenitized intrusive breccia	Schreiner (1993)														4700		1482			62		14	7	17	57			7.9	38	31	<0.2	42				7				5	22	<5				<20
31	Gallinas Mountains	breccia pipe	fenitized intrusive breccia	Schreiner (1993)														1900		534			51		59	22	26	62			5	24	5	<0.2	<5				15				3	19	<5				<10
35	Gallinas Mountains	breccia pipe	fragments of fenitized gneiss and intrusive breccia in tree roots	Schreiner (1993)														1600		459			27		37	14	25	62			5.2	33	<5	<0.2	<5				7	201			2	71	<5				<20
36	Gallinas Mountains	breccia pipe	fenitized and carconatized intrusive breccia in tree roots	Schreiner (1993)														1600		329			57		44	19	193	108			3.1	23	165	<0.2	<5				10	395			7	16	<5				<20
37	Gallinas Mountains	breccia pipe	fragments of fenitized and carbonatized intrusive breccia in tree roots	Schreiner (1993)														3000		542		57	26		55	22	54	120			5	23	18	<0.2	5				23	676			3	18	<5				<20
38	Gallinas Mountains	breccia pipe	fragments of fenitized and carbonatized intrusive breccia from dump	Schreiner (1993)														2800		1104		52	39		41	21	47	144			4.7	25	73	<0.2	<5				16	867			3	28	<5				<20
39	Gallinas Mountains	breccia pipe	fragments of fenitized and carbonatized intrusive breccia from dump	Schreiner (1993)														3700		1368		74	31		61	24	53	133			4.9	31	11	<0.2	<5				19	772			5	20	<5				<20
40	Gallinas Mountains	breccia pipe	fragments of silicified intrusive breccia from dump	Schreiner (1993)														6000		515		61	55		70	25	30	113			5.5	23	15	<0.2	<5				20	889			6	20	<5				<20
41	Gallinas Mountains	breccia pipe	fenitized gneiss	Schreiner (1993)														3200		801		102	9		22	3	10	42			6.6	60.7	<5	<0.2	<5				2	131			<1	17	<5				<20
43	Gallinas Mountains	breccia pipe	carbonatized intrusive breccia	Schreiner (1993)														2000		1089			36		18	17	56	71			6.2	27	<5	<0.2	10				16				4	12	<5				<20
44	Gallinas Mountains	breccia pipe	fenitized intrusive breccia	Schreiner (1993)														1500		1375			55		37	18	34	69			3.9	27.8	20	<0.2	<5				14				3	18	<5				<10
45	Gallinas Mountains	breccia pipe	intrusive breccia	Schreiner (1993)														1400		399			53		33	27	10	45			5.7	32.5	12	<0.2	7				12				<1	19	<5				<10
55	Gallinas Mountains	breccia pipe	fragments of fenitized intrusive breccia from dump	Schreiner (1993)														1100		445			46		37	19	14	25			3.9	18	<5	<0.2	<5				16				<1	8	<5				<20
56	Gallinas Mountains	breccia pipe	fragments of fenitized intrusive breccia	Schreiner (1993)														1600		68			44		21	22	48	66			5.8	20.5	12	0.4	34				6				9	233	8				<10
57	Gallinas Mountains	breccia pipe	fragments of intrusive breccia	Schreiner (1993)														1500		469			42		27	19	64	65			3.4	22.7	7	0.2	18				9				3	52	5				<10
60	Gallinas Mountains	breccia pipe	fragments of intrusive breccia	Schreiner (1993)														1100		646			32		80	17	22	39			3.2	20.9	<5	0.2	16				10				2	55	<5				<10
62	Gallinas Mountains	breccia pipe	fragments of intrusive breccia	Schreiner (1993)														2500		393			40		66	16	28	45			5.5	28	15	<0.2	<5				12				12	88	5				<10
63	Gallinas Mountains	breccia pipe	fragments of intrusive breccia	Schreiner (1993)														2600		559			48		24	15	12	57			6.2	31.3	<5	<0.2	12				11				11	26	<5				<10
64	Gallinas Mountains	breccia pipe	brecciated zone in sandstone	Schreiner (1993)														8100		735			144		63	4	86	19			4.5	56.4	30	<0.2	39				2				10	109	75				<10
65	Gallinas Mountains	breccia pipe	fragments of intrusive breccia	Schreiner (1993)														1100		434			38		39	14	11	32			4.2	19.6	<5	0.5	<5				11				3	23	<5				<10
66	Gallinas Mountains	breccia pipe	fragments of intrusive breccia	Schreiner (1993)														1000		295			37		32	15	7	33			9.5	43	<5	<0.2	5				11				3	5	<5				<20
67	Gallinas Mountains	breccia pipe	fragments of intrusive breccia	Schreiner (1993)														820		236			38		26	13	41	32			11.2	59.7	<5	<0.2	16				11				1	19	6				<10
68	Gallinas Mountains	breccia pipe	fragments of fenitized intrusive breccia	Schreiner (1993)														770		309			35		27	13	23	78			12	54	<5	<0.2	14				8				5	81	<5				<10
69	Gallinas Mountains	breccia pipe	outcrop of altered intrusive breccia	Schreiner (1993)														700		205			41		25	9	5	39			11.5	56	<5	<0.2	8				6				2	18	<5				<10
70	Gallinas Mountains	breccia pipe	fragments of altered intrusive breccia	Schreiner (1993)														710		332			39		27	16	16	31			12.8	67.9	<5	<0.2	<5				12				2	55	<5				<10
71	Gallinas Mountains	breccia pipe	intrusive breccia	Schreiner (1993)														>20000		1325		<1	458		28	5	6	16			7.6	20	141	<0.2	<5				2	>20000			20	72	<5				<20
72	Gallinas Mountains	breccia pipe	fenitized intrusive breccia	Schreiner (1993)														3300		352			187		28	5	9	37			9.8	49	27	<0.2	<5				3				20	36	<5				<10
73	Gallinas Mountains	breccia pipe	fenitized intrusive breccia	Schreiner (1993)														4000		202		72	125		34	3	25	52			10	38	58	<0.2	7				2	786			41	1244	<5				<20
74	Gallinas Mountains	breccia pipe	fragments of fenitized intrusive breccia	Schreiner (1993)														3300		246		93	168		16	5	8	24			7.8	38	35	<0.2	<5				3	345			6	180	<5				<20
75	Gallinas Mountains	breccia pipe	float	Schreiner (1993)														>20000		>2000			725		44	3	108	17			13	30	116	<0.2	46				2				72	1353	<5				<10
76	Gallinas Mountains	breccia pipe	fenitized intrusive breccia	Schreiner (1993)														11100		428			110		6	6	30	47			6	47.6	19	<0.2	26				3	54800			63	402	11				<10
77	Gallinas Mountains	breccia pipe	fenitized intrusive breccia	Schreiner (1993)														9500		439			177		5	5	15	58			6.8	36.3	24	<0.2	<5				5	56000			33	685	<5				<10
78	Gallinas Mountains	breccia pipe	fenitized and carbonatized trachyte	Schreiner (1993)														4000		639		148	56		5	2	9	150			5.3	42	<5	<0.2	7				8	10186			10	78	<5				<20
79	Gallinas Mountains	breccia pipe	fenitized intrusive breccia	Schreiner (1993)														9700		496			221		7	7	34	82			9.2	52	29	<0.2	<5				3	116800			54	1701	<5				<10
80	Gallinas Mountains	breccia pipe	fenitized intrusive breccia	Schreiner (1993)														12900		839			696		8	3	95	43			84	130	17	<0.2	<5				4	235200			34	64	22				<10
81	Gallinas Mountains	breccia pipe	fenitized intrusive breccia	Schreiner (1993)														3100		566			66		8	4	178	79			4.1	47.7	18	<0.2	49				3	21500			232	2124	<5				<10
82	Gallinas Mountains	breccia pipe	fenitized intrusive breccia	Schreiner (1993)														10500		405			235		5	4	14	113			7.2	42.5	24	<0.2	<5				2	164800			20	968	<5				<10
83	Gallinas Mountains	breccia pipe	fractured and fenitized trachyte near edge of intrusive breccia	Schreiner (1993)														1500		188		132	93		21	3	12	43			7.8	56.4	11	<0.2	9				2	187			9	389	<5				<20
84	Gallinas Mountains	breccia pipe	fragments of fenitized intrusive breccia	Schreiner (1993)														2000		140		102	160		29	5	4	24			7.5	43	<5	<0.2	<5				4	226			6	148	<5				<20
86	Gallinas Mountains	breccia pipe	fragments of fenitized intrusive breccia	Schreiner (1993)														2700		90		69	548		21	4	6	6			13	40	27	<0.2	18				2	363			46	44	<5				<20
87	Gallinas Mountains	breccia pipe	fenitized intrusive breccia	Schreiner (1993)														>20000		437			664		23	4	11	53			17	100	32	<0.2	<5				3				150	75	<5				<10
88	Gallinas Mountains	breccia pipe	outcrop of fractured trachyte	Schreiner (1993)														3600		168			82		27	3	9	58			6.2	41.6	48	<0.2	<5				3				3	7	<5				<10
97	Gallinas Mountains	breccia pipe	fenitized and carbonatized intrusive breccia	Schreiner (1993)														2200		445			52		28	14	19	74			5.7	29	23	<0.2	24				7				4	18	<5				<10
98	Gallinas Mountains	breccia pipe	fenitized and carbonatized intrusive breccia	Schreiner (1993)														1800		417			52		27	15	11	80			5.7	28.5	17	<0.2	10				8				6	13	<5				<10
99	Gallinas Mountains	breccia pipe	fragments of intrusive breccia in float	Schreiner (1993)														1900		481			101		33	18	11	56			5.2	28.4	<5	<0.2	13				10				3	25	<5				<10
100	Gallinas Mountains	breccia pipe	intrusive breccia	Schreiner (1993)														2500		409			85		41	17	10	56			4.1	9.6	16	<0.2	11				7				22	22	5				<10
101	Gallinas Mountains	breccia pipe	brecciated sandstone	Schreiner (1993)														1800		85			30		29	16	5	11			2	6.5	11	0.2	14				4				2	6	<5				<10
102	Gallinas Mountains	breccia pipe	brecciated sandstone	Schreiner (1993)														18700		591			127		13	5	15	52			24.6	25.5	7	<0.2	<5				5				17	255	<5				<10
103	Gallinas Mountains	breccia pipe	brecciated sandstone	Schreiner (1993)														3000		347			112		25	15	75	67			4.8	8.4	<5	<0.2	<5				5				23	11	<5				<10
GM-10-1	Gallinas Mountains	breccia pipe	M&E #13 intrusive breccia	McLemore (2010)																279		94	83		16	<10	<10	76			<20	<20			20				<10				343	114					10
GM-10-2	Gallinas Mountains	breccia pipe	Conqueror #4 fluorite breccia	McLemore (2010)																2322		<100	100		<50	<50	<50	<50			<50	<50			<50				<50				<50	228					<50
4094	Gallinas Mountains	breccia pipe		McLemore (2010)																			189				8580																	22200
58	Gallinas Mountains	skarn	iron skarn in contact with trachyte	Schreiner (1993)														280		29			16		29	11	12	30			20	8	8	0.7	7				120				24	13	2.1				<10
59	Gallinas Mountains	skarn	fragments of iron skarn from dump	Schreiner (1993)														950		31			8		56	11	88	41			18.9	13.8	<5	<0.2	<5				34				6	31	14				<10
61	Gallinas Mountains	skarn	fragments of iron skarn from dump	Schreiner (1993)														1000		165			28		14	6	70	53			<1	3.6	<5	<0.2	<5				7				<1	340	<5				<10
96	Gallinas Mountains	skarn	fragments of magnetite-hematite with minor quartz from dump	Schreiner (1993)														230		47			5		74	10	104	77			8.4	2.1	6	<0.2	<5				17				14	56	14				<10
260	Gallinas Mountains	skarn	magnetite-hematite	Schreiner (1993)														200		53			7		41	<1	13	55			4	1.8	<2	<0.5	29				78				7	14	1.7				14
GM-09-LC-2	Gallinas Mountains	skarn	fragment of iron skarn	McLemore (2010)																513		114	32		10	<10	198	<10			<20	83			563				21				359	704					<10
9671	Gallinas Mountains	skarn		McLemore (1983)																											700
A6A	Capitan Mountains	igneous rock	granophyre	Allan and McLemore(1990)	76	0.11	12.9	0.63	0.03	0.05	0.07	4.55	4.19	0.02	0.71	99.26		82.8	134	28	215	68	74	3		6		5		5.2	2.73	27.1							0.68		23
A11	Capitan Mountains	igneous rock	granophyre	Allan and McLemore(1990)	75.5	0.15	13.2	0.78	0.01	0.05	0.04	4.69	4.42	0.02	0.59	99.45		39.8	124	28	295	70	68	2		2		51		5.18	3.1	30.1							0.13		23			41
A12	Capitan Mountains	igneous rock	granophyre	Allan and McLemore(1990)	77.2	0.12	13	0.53	0.04	0.05	0.07	6.52	1.28	0.02	0.41	99.24		56.7	28	32	230	70	66	2		2		4		5.15	2.63	27.1							0.18		23
A13	Capitan Mountains	igneous rock	granophyre	Allan and McLemore(1990)	74.4	0.18	13	1.32	0.02	0.13	0.35	4.44	4.92	0.02	0.41	99.19	0.06	45.9	134	5	270	52	78	2		2		27		3.81	3.02	21.8							0.16		20			25
A15	Capitan Mountains	igneous rock	granophyre	Allan and McLemore(1990)	74.2	0.18	13.3	0.98	0.01	0.1	0.31	4.28	5.18	0.02	0.68	99.24	0.13	24	162	10	330	68	48	2		2		27		4.09	3.59	30.4							0.12		22			7
A16	Capitan Mountains	igneous rock	granophyre	Allan and McLemore(1990)	73.8	0.18	13.3	1.46	0.01	0.05	0.07	4.44	4.85	0.02	0.66	98.84		59	134	5	325	66	58	2		2		9		4.67	4.33	22.1							0.48		21			11
M102	Capitan Mountains	igneous rock	granophyre	Allan and McLemore(1990)	74.1	0.2	13.7	1.74	0.02	0.09	0.14	5.14	4.18		0.67	99.98			131	38	362	68	50			34		4			6	32									23		2	6
M200	Capitan Mountains	igneous rock	granophyre	Allan and McLemore(1990)	74.1	0.2	13.3	1.48	0.01	0.16	0.21	4.69	5.16	0.01	0.41	99.73			150	24	323	69	32			46		22			4	32									23		2	15
M202	Capitan Mountains	igneous rock	granophyre	Allan and McLemore(1990)	74.9	0.19	13.6	1.63	0.02		0.27	4.86	5.02	0.01	0.48	100.98			149	27	262	63	53			45		32			5	31									23		2	20
M218	Capitan Mountains	igneous rock	granophyre	Allan and McLemore(1990)	70.9	0.25	13.1	1.69	0.18	0.09	3.08	4.4	5.38	0.03	2.21	101.31
M223	Capitan Mountains	igneous rock	granophyre	Allan and McLemore(1990)	76.3	0.19	13.3	0.79	0.01		0.19	6.94	1.04	0.01	0.43	99.2			25	28	272	65	58			38		6			4	25									23		22	1
M224	Capitan Mountains	igneous rock	granophyre	Allan and McLemore(1990)	77.2	0.17	13.4	1.66	0.02		0.14	4.34	5.22	0.01	0.44	102.6			125	18	267	67	62			46	8	9			5	27									24		2	3
M225	Capitan Mountains	igneous rock	granophyre	Allan and McLemore(1990)	75.4	0.18	13.5	1.14	0.01		0.15	6.4	2.21	0.01	0.39	99.39			64	39	289	64	68			46		8			6	23									23		3	5
M226	Capitan Mountains	igneous rock	granophyre	Allan and McLemore(1990)	75.9	0.15	13	1.37	0.01		0.13	3.72	5.25	0.01	0.63	100.17			174	17	222	65	67								4	21											1	3
M227	Capitan Mountains	igneous rock	granophyre	Allan and McLemore(1990)	74.6	0.14	12.8	1.46	0.03		0.38	4.05	5.49		0.51	99.46			227	17	215	68	76			58		33			5	20									23		2	10
M228	Capitan Mountains	igneous rock	granophyre	Allan and McLemore(1990)	75.3	0.16	13.2	1.2	0.01	0.01	0.27	4.55	4.94	0.01	0.32	99.97			215	23	275	68	57			55	16	22			3	25									24		2	10
M229	Capitan Mountains	igneous rock	granophyre	Allan and McLemore(1990)	74.2	0.13	12.8	1.58	0.04	0.03	0.35	4.07	5.34	0.01	0.6	99.15			226	16	259	71	72			45		27			6	25									23		2	14
M233	Capitan Mountains	igneous rock	granophyre	Allan and McLemore(1990)	75.5	0.17	13.4	1.03	0.01		0.13	5.25	4.29	0.01	0.75	100.54			129	33	306	69	72			50	16	50			3	27									22		2	17
M234	Capitan Mountains	igneous rock	granophyre	Allan and McLemore(1990)	76.1	0.18	12.5	1.39	0.19		0.67	5.8	2.56	0.05	0.53	99.97		580						107	53
M240	Capitan Mountains	igneous rock	granophyre	Allan and McLemore(1990)	73.8	0.23	13.8	1.58	0.02	0.07	0.15	4.92	5.2	0.01	0.5	100.28			157	5	333	64	51			55		20			5	28									22		2	8
M241	Capitan Mountains	igneous rock	granophyre	Allan and McLemore(1990)	73.4	0.23	13.7	1.83	0.05	0.06	0.15	4.97	5.2	0.02	0.22	99.83			157	11	392	56	75			46		18			4	23									22		2	20
M203	Capitan Mountains	igneous rock	mineralizedgranophyre	Allan and McLemore(1990)	75.7	0.18	13.3	1.31	0.03	0.03	0.18	5.63	3.79	0.01	0.34	100.5			128	24	268	63	66			47	2	5			8	31									23		2	5
M1	Capitan Mountains	igneous rock	mineralizedgranophyre	Allan and McLemore(1990)	76.8	0.23	13.1	1.04	0.02	2	0.15	4.81	3.99	0.01	0.63	102.78
M3	Capitan Mountains	igneous rock	mineralizedgranophyre	Allan and McLemore(1990)	75.5	0.22	13.3	0.64	0.02		0.14	4.46	5.38		0.28	99.94			155	61	282	57	25								6	60											2	5
A17	Capitan Mountains	igneous rock	aplite	Allan and McLemore(1990)	73	0.22	13.8	1.52	0.06	0.16	0.2	4.6	5.18	0.02	0.64	99.4	0.02	33.2	142	5	345	60	78	2		2		23		4.49	4.31	27.8							0.12		21			6
A18	Capitan Mountains	igneous rock	aplite	Allan and McLemore(1990)	72.7	0.25	14	1.62	0.02	0.17	0.29	4.57	5.43	0.02	0.46	99.53	0.03	59.3	148	5	330	54	80	2		2		24		4.02	4.2	25.4							0.21		21			23
A21	Capitan Mountains	igneous rock	aplite	Allan and McLemore(1990)	72.7	0.25	13.9	1.57	0.1	0.17	0.36	4.73	5.23	0.02	0.4	99.43	0.06		138	5	325	50	74	2		2		68			3.33	23.1									22			9
A22	Capitan Mountains	igneous rock	aplite	Allan and McLemore(1990)	72.6	0.26	14	1.61	0.03	0.19	0.41	4.67	5.19	0.02	0.37	99.35	0.06	66.2	108	10	355	52	76	3		2		37		3.81	3.08	23.9							0.4		22			24
A24	Capitan Mountains	igneous rock	aplite	Allan and McLemore(1990)	72.7	0.25	14	1.59	0.06	0.18	0.33	4.61	5.29	0.02	0.35	99.38	0.02		150	5	400	58	76	2		2		90		4.36	3.09	31.6							0.23		21			13
M100	Capitan Mountains	igneous rock	aplite	Allan and McLemore(1990)	73.4	0.23	13.7	1.83	0.05	0.06	0.15	4.97	5.2	0.02	0.22	99.83			161	15	341	61	65			42		15			3	26									23		2	10
M101	Capitan Mountains	igneous rock	aplite	Allan and McLemore(1990)	74	0.2	13.5	1.69	0.02	0.08	0.11	4.96	4.88	0.01	0.43	99.88			160	8	304	65	66			34		9			6	21									25		2	10
M103	Capitan Mountains	igneous rock	aplite	Allan and McLemore(1990)	75.7	0.18	13.3	1.31	0.03	0.03	0.18	5.63	3.79	0.01	0.34	100.5			128	24	324	69	66								8	31
M104	Capitan Mountains	igneous rock	aplite	Allan and McLemore(1990)	74.8	0.29	13.8	1.16	0.05	0.05	0.38	6.34	2.89		0.57	100.33			92	65	318	54	67			63	9	74			5	16									21		2	63
M105	Capitan Mountains	igneous rock	aplite	Allan and McLemore(1990)	74.8	0.3	14	1.03	0.17	0.09	0.32	5.57	4	0.5	0.68	101.46			132	69	320	59	57			40	2	73			4	10									22		2	41
M107	Capitan Mountains	igneous rock	aplite	Allan and McLemore(1990)	73	0.22	13.8	1.58	0.06		0.5	5.8	5.14	0.02	0.59	100.71			150	23	347	70	94			42		65			5	28									24		2	31
M221	Capitan Mountains	igneous rock	aplite	Allan and McLemore(1990)	73.7	0.27	14.3	1.2	0.01		0.16	4.91	5.25	0.02	0.52	100.34			143	44	382	58	22			41	10	49			4	20									22		2	20
M222	Capitan Mountains	igneous rock	aplite	Allan and McLemore(1990)	73	0.26	13.9	1.01	0.11	0.1	0.22	5.38	4.59	0.01	0.38	98.96			130	49	316	59	80			60		148			5	24									22		2	25
M242	Capitan Mountains	igneous rock	aplite	Allan and McLemore(1990)	74	0.24	13.8	1.77	0.01	0.02	0.19	5.06	5	0.01	0.5	100.6			116	27	352	64	23			47	10	10			6	27									23		2	6
M243	Capitan Mountains	igneous rock	aplite	Allan and McLemore(1990)	72.4	0.29	14	1.84	0.03	0.14	0.49	5.01	5.37	0.05	0.3	99.92			119	19	364	54	80			44		29			2	21									22		2	15
M244	Capitan Mountains	igneous rock	alteredaplite	Allan and McLemore(1990)	72.2	0.26	13.9	1.96	0.02	0.06	0.25	4.7	5.4	0.01	0.79	99.55										42		41													21
M245	Capitan Mountains	igneous rock	alteredaplite	Allan and McLemore(1990)	71.8	0.27	13.8	1.77	0.05	0.09	0.41	4.92	5.27	0.02	0.42	98.82			149	24	322	49	79			44		43			3	22									24		2	20
M246	Capitan Mountains	igneous rock	aplite	Allan and McLemore(1990)	73.1	0.26	14	1.8	0.04	0.05	0.41	4.95	5.23	0.01	0.35	100.2			165	14	315	54	75			48	8	55			2	21									20		2	21
M256	Capitan Mountains	igneous rock	aplite	Allan and McLemore(1990)	73.5	0.27	13.8	1.71	0.08	0.09	0.4	5.15	5.24	0.01	0.44	100.69			165	7	370	54	78			44		80			4	24									22		2	24
M257	Capitan Mountains	igneous rock	aplite	Allan and McLemore(1990)	72.6	0.28	14.2	1.89	0.05	0.11	0.51	5.1	5.39	0.02	0.4	100.55			142	16	316	52	81			41	5	35			3	23									21		2	22
M258	Capitan Mountains	igneous rock	aplite	Allan and McLemore(1990)	72.3	0.27	14	1.82	0.04	0.1	0.42	5.07	5.21	0.01	0.68	99.92			158	5	368	57	75			43	14	26			3	23									23		2	16
M259	Capitan Mountains	igneous rock	aplite	Allan and McLemore(1990)	71.3	0.26	13.6	1.88	0.04	0.16	0.53	4.88	5.31	0.02	0.39	98.37			138	9	301	50	82			44		28			3	24									23		2	15
M260	Capitan Mountains	igneous rock	aplite	Allan and McLemore(1990)	74.7	0.25	13.7	1.1	0.03	0.3	0.22	3.98	6.85	0.03	0.75	101.91			167	10	335	52	85			45	2	18			1	23									23		2	8
M219	Capitan Mountains	igneous rock	mineralizedaplite	Allan and McLemore(1990)	74.4	0.24	13.8	1.37	0.05	0.1	0.19	5.57	4.21	0.01	0.28	100.22			110	51	286	59	28			106	2	90			4	28									24		2	19
M220	Capitan Mountains	igneous rock	mineralizedaplite	Allan and McLemore(1990)	75	0.27	14.1	1.2	0.13	0.77	0.47	5.32	4.75	0.01	0.39	102.41			138	42	309	52	87			55		24			4	23									23		2	23
A5	Capitan Mountains	igneous rock	porphyry	Allan and McLemore(1990)	69.7	0.38	14.7	2.34	0.01	0.41	0.64	3.99	5.63	0.06	1.29	99.15	0.04	827	88	130	425	38	46	6		2		55		2.75	4.99	20.4							1.15		18			23
A26	Capitan Mountains	igneous rock	porphyry	Allan and McLemore(1990)	69.7	0.4	14.6	2.28	0.04	0.38	0.92	3.79	6.06	0.07	0.75	98.99	0.05	737	138	145	465	38	68	6		2		56		2.54	3.56	19							0.86		18			38
A28	Capitan Mountains	igneous rock	porphyry	Allan and McLemore(1990)	69.7	0.42	15.1	2.04	0.01	0.34	0.98	3.95	6	0.07	0.93	99.54	0.04	943	110	156	405	34	52	7		2		17		2.38	3.71	17.7							0.77		16			4
A29	Capitan Mountains	igneous rock	porphyry	Allan and McLemore(1990)	69.6	0.44	15.1	2.02	0.05	0.33	0.86	4.09	5.76	0.07	1.47	99.79	0.03	951	112	74	430	34	54	7		2		64		2.04	3.11	18.2							1.03		17			34
A34	Capitan Mountains	igneous rock	porphyry	Allan and McLemore(1990)	70.1	0.4	15.1	1.89	0.06	0.38	0.93	4.3	5.8	0.07	1.71	100.74	0.03	580	108	68	420	36	60	6		2		61		2.66	2.92	18.4							0.8		18			13
A35	Capitan Mountains	igneous rock	porphyry	Allan and McLemore(1990)	70	0.42	14.9	2	0.06	0.34	0.89	4.17	5.84	0.07	0.63	99.32	0.03	760	114	62	410	32	52	7		2		62		2.38	3.16	17.8							0.9		17			23
A50	Capitan Mountains	igneous rock	porphyry	Allan and McLemore(1990)	70.7	0.44	15.6	0.76	0.01	0.28	0.83	4.67	5.35	0.03	0.91	99.58	0.02	769	116	180	465	34	54	3		2		18		2.52	3.19	17.8							0.52		17
A54	Capitan Mountains	igneous rock	porphyry	Allan and McLemore(1990)	70.1	0.42	14.9	2.03	0.06	0.39	0.89	4.19	5.64	0.09	0.65	99.36	0.03	926	108	66	405	32	52	7		2		59		2.49	3.3	18.6							1.12		18			26
M106	Capitan Mountains	igneous rock	porphyry	Allan and McLemore(1990)	71.5	0.28	14.2	1.73	0.1	0.06	0.42	5.6	4.71	0.01	0.51	99.12			128	45	333	51	85			46	17	70			6	22									24		2	23
M211	Capitan Mountains	igneous rock	porphyry	Allan and McLemore(1990)	69.9	0.44	14.9	2.35	0.07	0.22	0.98	4.43	5.59	0.06	0.69	99.63			120	78	476	34	47			49		53			3	16									19		2	23
M212	Capitan Mountains	igneous rock	alteredporphyry	Allan and McLemore(1990)	69.1	0.43	14.5	2.5	0.07	0.43	1.18	3.7	5.92	0.07	0.98	98.88			147	87	387	30	49			34		53			5	18									18		2	14
M214	Capitan Mountains	igneous rock	porphyry	Allan and McLemore(1990)	70.5	0.42	14.8	2.4	0.09	0.37	1.05	4.23	5.68	0.06	1.13	100.73			129	84	463	33	50			37		79			3	18									17		2	39
M215	Capitan Mountains	igneous rock	porphyry	Allan and McLemore(1990)	70.6	0.42	15.5	1.39	0.02	0.12	0.36	5.2	4.95	0.04	1.35	99.95			94	122	386	34	55			48	3	42			4	18									18		2	15
M216	Capitan Mountains	igneous rock	porphyry	Allan and McLemore(1990)	73.1	0.27	14	1.02	0.03	0.09	0.27	5.59	4.59	0.01	1.09	100.06			130	99	409	33	52			62		57			4	17									19		2	22
M245	Capitan Mountains	igneous rock	porphyry	Allan and McLemore(1990)	71.8	0.27	13.8	1.77	0.05	0.09	0.41	4.92	5.27	0.02	0.42	98.82			149	24	390	54	79								3	22
M247	Capitan Mountains	igneous rock	porphyry	Allan and McLemore(1990)	72.9	0.27	13.1	1.98	0.04	0.06	0.5	4.87	5.34	0.02	0.35	99.43			148	16	375	52	73			46		62			3	24									22		2	26
M248	Capitan Mountains	igneous rock	porphyry	Allan and McLemore(1990)	70.9	0.29	14.4	1.9	0.08	0.06	0.52	5.04	5.34	0.02	0.74	99.29			167	10	229	47	73			42	14	105			2	19									21		2	56
M249	Capitan Mountains	igneous rock	porphyry	Allan and McLemore(1990)	73.2	0.27	14.2	1.94	0.06	0.04	0.49	4.9	5.48	0.01	0.35	100.94			141	24	356	50	70			52		54			2	18									23		2	22
M250	Capitan Mountains	igneous rock	alteredporphyry	Allan and McLemore(1990)	72.9	0.26	14.1	1.9	0.05	0.14	0.52	4.62	5.35	0.02	0.94	100.8			131	37	367	55	76			36	9	61			4	21									23		2	26
M251	Capitan Mountains	igneous rock	porphyry	Allan and McLemore(1990)	72.4	0.28	14.1	1.9	0.03	0.11	0.53	4.51	5.42	0.01	0.79	100.08			144	28	368	50	69			40	7	55			4	25									21		2	20
M252	Capitan Mountains	igneous rock	porphyry	Allan and McLemore(1990)	61.7	0.98	16.6	6.66	0.09	2.57	4.04	4.04	4.13	0.28	0.68	101.77			171	7	317	47	76			42	21	99			5	23									19		2	35
M253	Capitan Mountains	igneous rock	porphyry	Allan and McLemore(1990)	72.2	0.26	13.9	2	0.05	0.08	0.51	4.73	5.4	0.01	0.41	99.55			141	32	369	53	79			49	9	58			6	23									22		2	22
M254	Capitan Mountains	igneous rock	porphyry	Allan and McLemore(1990)	72.9	0.26	14.2	1.81	0.05	0.12	0.5	4.8	5.44	0.02	0.63	100.73			156	22	358	54	78			45		79			4	22									24		2	24
M255	Capitan Mountains	igneous rock	porphyry	Allan and McLemore(1990)	72.6	0.26	13.7	1.86	0.06	0.06	0.47	4.81	5.36	0.02	0.63	99.83			179	13	364	56	78			45	18	74			4	27									23		2	24
M259	Capitan Mountains	igneous rock	porphyry	Allan and McLemore(1990)	71.3	0.26	13.6	1.88	0.04	0.16	0.53	4.88	5.31	0.02	0.39	98.37			138	9	364	55	82								3	24
M280	Capitan Mountains	igneous rock	porphyry	Allan and McLemore(1990)	74.3	0.38	15.8	0.47		0.03	0.59	6.6	3.46		0.52	102.15		311						78	101	7		12													18
M281	Capitan Mountains	igneous rock	porphyry	Allan and McLemore(1990)	71.4	0.41	15.2	2.36	0.01	0.49	0.68	3.32	5.82	0.01	2.58	102.28										8	4	165													19
M285	Capitan Mountains	igneous rock	porphyry	Allan and McLemore(1990)	70.5	0.38	14.8	2.35	0.03	0.32	0.5	3.99	6.04	0.05	1.22	100.18		518						102	40	6		41													19
M286	Capitan Mountains	igneous rock	porphyry	Allan and McLemore(1990)	70.8	0.4	15.5	2.26	0.02	0.19	2.88	4.93	6.01	0.06	0.6	103.65		473						103	47
M287	Capitan Mountains	igneous rock	porphyry	Allan and McLemore(1990)	68.9	0.43	15.5	2.41	0.03	0.32	0.85	4.38	6.26	0.06	1.19	100.33		520						110	45	7	35	32													20
M288	Capitan Mountains	igneous rock	porphyry	Allan and McLemore(1990)	68.1	0.42	15.3	2.35	0.09	0.39	1.08	4	5.88	0.07	1.11	98.79										9		88													20
M289	Capitan Mountains	igneous rock	porphyry	Allan and McLemore(1990)	69	0.38	14.9	2.24	0.07	0.28	0.88	4.25	5.81	0.05	0.88	98.74										8	1	54													22
M290	Capitan Mountains	igneous rock	porphyry	Allan and McLemore(1990)	72.4	0.41	15.6	2.36	0.07	0.53	1.1	4.04	6.21	0.05	1.32	104.09										7		47													18
M291	Capitan Mountains	igneous rock	porphyry	Allan and McLemore(1990)	71.2	0.42	15.3	2.05	0.03	0.28	1.09	4.55	5.62	0.06	1.02	101.62		586						99	58	7		34													20
M293	Capitan Mountains	igneous rock	alteredporphyry	Allan and McLemore(1990)	72.3	0.3	14.5	1.99	0.03	0.13	0.56	4.67	5.7	0.02	0.38	100.58		63						69	68	6	7	58													21
M295	Capitan Mountains	igneous rock	alteredporphyry	Allan and McLemore(1990)	72.4	0.32	15.2	1.15	0.04	0.19	0.58	5.08	5.07		1.03	101.06		122						76	58	8	5	42													21
M296	Capitan Mountains	igneous rock	alteredporphyry	Allan and McLemore(1990)	72.7	0.31	14.8	1.12	0.04	0.21	0.57	5.17	4.82	0.03	0.72	100.49										7		91													22
M298	Capitan Mountains	igneous rock	alteredporphyry	Allan and McLemore(1990)	74.1	0.3	14.6	0.74	0.03	0.05	0.55	5.01	5.02	0.01	0.73	101.14		111						65	62	6		47													23
M299	Capitan Mountains	igneous rock	porphyry	Allan and McLemore(1990)	73.4	0.28	14.5	1.04	0.01	0.04	0.48	5.48	4.78	0.01	0.57	100.59		48						64	61	8	9	51													22
M300	Capitan Mountains	igneous rock	porphyry	Allan and McLemore(1990)	69.2	0.39	15.3	2.1	0.02	0.51	0.84	3.99	6.81	0.07	0.9	100.13
M301	Capitan Mountains	igneous rock	porphyry	Allan and McLemore(1990)	72.4	0.28	14.5	1.87	0.03	0.13	0.53	4.57	5.31	0.04	0.65	100.31		148						73	54
M302	Capitan Mountains	igneous rock	porphyry	Allan and McLemore(1990)	71.1	0.43	15.3	2.18	0.1	0.38	0.95	4.53	5.63	0.07	0.53	101.2		862						122	52
M303	Capitan Mountains	igneous rock	porphyry	Allan and McLemore(1990)	70.5	0.42	15.1	2.25	0.08	0.37	0.96	4.4	5.63	0.09	0.78	100.58
M304	Capitan Mountains	igneous rock	porphyry	Allan and McLemore(1990)	70.6	0.41	14.8	2.13	0.06	0.5	0.87	4.44	5.51	0.07	0.47	99.86
M305	Capitan Mountains	igneous rock	porphyry	Allan and McLemore(1990)	72.3	0.31	14.8	1.84	0.03	0.27	0.57	4.96	5.18	0.05	0.6	100.91
M307	Capitan Mountains	igneous rock	porphyry	Allan and McLemore(1990)	71.1	0.43	15.2	2.15	0.02	0.43	1.01	4.69	5.49	0.08	0.58	101.18
CM230	Capitan Mountains	vein	mineralized vein	McLemore and Phillips(1990)				39.9															59									8
CM235	Capitan Mountains	vein	mineralized vein	McLemore and Phillips(1990)	76.1	0.18	12.5	1.39	0.19		0.67	5.8	2.56	0.05	0.53	99.97							110									14
CPU3(7920	Capitan Mountains	vein	mineralized vein	McLemore and Phillips(1990)																			58
FNut(7922)	Capitan Mountains	vein	mineralized vein	McLemore and Phillips(1990)																			60
P4484	Capitan Mountains	vein	mineralized vein	McLemore and Phillips(1990)	76	0.23	13.1	1.04	0.02		0.65	4.81	3.99	0.01	0.63	100.48							87									2460
P4485	Capitan Mountains	vein	mineralized vein	McLemore and Phillips(1990)																			10									5
P4486	Capitan Mountains	vein	mineralized vein	McLemore and Phillips(1990)	75.5	0.22	13.3	0.64	0.02		0.14	4.46	5.38		0.28	99.94							61								6	740
P4487	Capitan Mountains	vein	mineralized vein	McLemore and Phillips(1990)																			131									245
WT(7924)	Capitan Mountains	vein	mineralized vein	McLemore and Phillips(1990)																			0.3
Hot(218)	Capitan Mountains	vein	mineralized vein	McLemore and Phillips(1990)	70.9	0.25	13.1	1.69	0.18	0.09	3.08	4.4	5.38	0.03	2.21	101.31																49
Hot(219)	Capitan Mountains	vein	mineralized vein	McLemore and Phillips(1990)	74.4	0.24	13.8	1.37	0.05	0.15	0.19	5.57	4.21	0.01	0.28	100.27							28								4	28
Hot(220)	Capitan Mountains	vein	mineralized vein	McLemore and Phillips(1990)	75	0.22	14.1	1.2	0.13	0.77	0.47	5.32	4.75	0.01	0.39	102.36							87								3	33
7923,KS1B	Capitan Mountains	vein	mineralized vein	McLemore and Phillips(1990)	65.1	0.06	18.2	1.65	0.06	0.08	0.19	6.89	5.38	0.03	0.88	98.52							344
7921,KS1A	Capitan Mountains	vein	mineralized vein	McLemore and Phillips(1990)	75.8	0.21	13.9	0.72	0.03	0.16	0.12	6.06	3.5	0.02	0.33	100.85							10
Mc(1784)	Capitan Mountains	vein	mineralized vein	McLemore and Phillips(1990)	65.9	0.47	14.3	3.51	0.12	0.17	1.18	3.02	7.35	0.04	1.99	98.05			229	100	343	113	309								9	198											3	100
Mc(3162)	Capitan Mountains	vein	mineralized vein	McLemore and Phillips(1990)																			140
CM104	Capitan Mountains	vein	mineralized vein	McLemore and Phillips(1990)	74.8	0.3	13.9	1.16	0.05	0.05	0.32	6.34	2.89		0.57	100.38							67								5	18
CM105	Capitan Mountains	vein	mineralized vein	McLemore and Phillips(1990)	74.8	0.3	14	1.03	0.17	0.09	0.32	5.57	4		0.68	100.96							57								4	10
Bear(3143)	Capitan Mountains	vein	mineralized vein	McLemore and Phillips(1990)																											110
136(Smo)	Capitan Mountains	Fe	mineralized vein	McLemore and Phillips(1990)
C-2	Capitan Mountains	vein	mineralized vein	McLemore and Phillips(1990)		0.38	11.45	2.8	0.1866	0.66	1.08	3.98	5.66				0.11	335	173	143	46	27	43	9	4	2	8	100											3		25			17
C-3	Capitan Mountains	vein	mineralized vein	McLemore and Phillips(1990)		0.18	2.93	12.87	0.1107	4.21	0.41	0.38	1.54	0.23			0.2	72	174	27	15	6	17	90	6	5	6	69											8		7		7
C-37	Capitan Mountains	vein	mineralized vein	McLemore and Phillips(1990)		0.12	7.11	0.51	0.0232		0.1	5.65	4.88				0.002	19	75	17	21	21	33	9	3	2	9	40													25
C-39	Capitan Mountains	vein	mineralized vein	McLemore and Phillips(1990)		0.22	11.04	1.12	0.0736		0.67	3.3	6.43	0.23			0.26	98	146	70	36	54	140	7	3		10	37													28			15
92-08	Capitan Mountains	mineralized vein	granophyre	Dunbar et al. (1996)	75.4	0.2	14.7	0.6	0.1		0.1	5.6	4.4		0.08	101.18		45	118	41	262	70	108					18	12.72	6.1	28	24.3							96	0.2				9	0.2
92-09	Capitan Mountains	mineralized vein	granophyre	Dunbar et al. (1996)	75.7	0.2	14.7	0.6	0.1	0.1	0.1	5.2	4.4		0.08	101.18		53	122	40	221	64	75					11	12.5	4.93	3.2	27.2							35	0.2				6	0.1
92-10	Capitan Mountains	mineralized vein	granophyre	Dunbar et al. (1996)	75.5	0.2	14.9	0.5	0.1	0.1	0.1	5.6	4.1		0.05	101.15			113	42	267	70	86																					7
92-11	Capitan Mountains	mineralized vein	granophyre	Dunbar et al. (1996)	75.9	0.2	14.8	0.6	0.1	0.4	0.1	5.1	4.5		0.08	101.78		52	123	42	283	68	130					12	14.09	5.8	4.1	27.2							91	0.24				5	0.2
92-12	Capitan Mountains	mineralized vein	granophyre	Dunbar et al. (1996)	75.6	0.2	12.8	0.7	0.1	0.1	0.1	5.7	4		0.07	99.37		56	111	42	245	63	69					13	13.16	5.17	3.5	10.2							47	0.24				5	0.2
92-13	Capitan Mountains	mineralized vein	granophyre	Dunbar et al. (1996)	77.8	0.2	13	0.7	0.1	0.1	0.1	5.8	4.2		0.08	102.08		55	113	42	266	67	89					17	13.04	6.23	3.3	12.3							96	0.21				6	0.2
92-14	Capitan Mountains	mineralized vein	granophyre	Dunbar et al. (1996)	77.3	0.2	13.1	0.7	0.1	0.4	0.1	5.7	4		0.07	101.67		82	107	42	224	65	89					16	11.5	5.26	3.9	11.6							61	0.22				5	0.3
92-15	Capitan Mountains	mineralized vein	granophyre	Dunbar et al. (1996)	76.8	0.2	13.1	0.7	0.2	0.6	0.1	6.2	3.4		0.07	101.37		138	93	45	246	67	78					14	9.85	5.48	3.2	8.6							62	0.23				4	0.4
92-16	Capitan Mountains	mineralized vein	granophyre	Dunbar et al. (1996)	75	0.2	12.8	0.6	0.1	0.2	0.1	6.1	3.5		0.07	98.67		49	89	34	252	69	66					10	13.86	5.62	3.5	15.7							63	0.21				9	0.2
92-17	Capitan Mountains	mineralized vein	granophyre	Dunbar et al. (1996)	76.8	0.2	14	0.5	0.1	0.3	0.1	5.7	4		0.07	101.77			101	32	265	69	91																					8
92-18	Capitan Mountains	mineralized vein	granophyre	Dunbar et al. (1996)	74.7	0.2	13.8	0.6	0.1	0.3	0.1	5.7	4		0.08	99.58		55	104	29	255	65	120					25	10.65	5.06	3.3	26.3							42	0.22				12	0.1
92-19	Capitan Mountains	mineralized vein	granophyre	Dunbar et al. (1996)	76.4	0.2	13.2	0.6	0.1	0.2	0.1	5.6	4		0.07	100.47		67	104	31	240	67	95					20	13.69	4.91	3.9	18.8							30	0.24				10	0.2
92-20	Capitan Mountains	mineralized vein	granophyre	Dunbar et al. (1996)	76.7	0.2	12.9	0.6	0.1		0.1	5.4	3.8		0.07	99.87		85	104	34	287	68	79					14	12.27	5.82	3.6	12.7							91	0.22				6	0.4
92-21	Capitan Mountains	mineralized vein	granophyre	Dunbar et al. (1996)	77.2	0.2	13.7	0.6	0.1	0.1	0.1	6	3.5		0.07	101.57		68	82	31	223	67	51					15	9.17	5.5	2.9	15.9							16	0.19				10	0.5
92-22	Capitan Mountains	mineralized vein	granophyre	Dunbar et al. (1996)	78.6	0.2	12.8	0.6	0.2	0.1	0.1	5.1	3.2		0.09	100.99		99	83	34	228	70	62					14	9.89	5.46	3	13.3							60	0.21				11
92-23	Capitan Mountains	mineralized vein	granophyre	Dunbar et al. (1996)	76.4	0.2	14.2	0.6	0.1	0.1	0.1	5.5	4.2		0.07	101.47		60	108	35	239	68	91					15	12.08	5.23	3.3	14.7							52	0.3				6	0.4
92-25	Capitan Mountains	mineralized vein	granophyre	Dunbar et al. (1996)	75.8	0.2	13.2	0.7	0.1		0.1	5.5	3.8		0.03	99.43		58	107	42	241	67	69					11	11.1	5.23	2.6	6							66	0.2				13	0.4
92-26	Capitan Mountains	mineralized vein	granophyre	Dunbar et al. (1996)	75.6	0.2	12.9	0.9	0.1		0.1	5.7	3.1		0.04	98.64			83	39	228	70	86																					11
92-27	Capitan Mountains	mineralized vein	granophyre	Dunbar et al. (1996)	75.5	0.2	13.6	0.8	0.1		0.1	5.1	4.7		0.05	100.15		71	128	38	262	68	70					16	13.8	5.45	3.4	7.6							60	0.27				5	0.3
92-28	Capitan Mountains	mineralized vein	granophyre	Dunbar et al. (1996)	76.4	0.2	13.2	0.9	0.1		0.1	5.1	4.5		0.05	100.55		61	129	41	265	69	83					14	12.58	5.93	3	7.5							85	0.23				5	0.3
92-29	Capitan Mountains	mineralized vein	granophyre	Dunbar et al. (1996)	74.8	0.2	14.3	0.7	0.1	0.1	0.1	4.8	4.7		0.05	99.85		56	134	43	240	68	97					21.6	12.07	5.03	3.7	28.72							27.5	0.25				5	0.3
CORN 31	Wind Mountain	igneous rocks	nepheline syenite, TSNP2	New Mexico Bureau of Mines and Mineral Resources et al. (1998)	60.1	0.18	17.7	5.09	0.21	0.24	1.16	6.83	5.44	0.09	1.02	98.06		182	115	60	744	96	24	6	30	<1	<1	95	13	6.1	3.8	11	<2	2.5	6.1		8	1.7	<1	13	27		4	15	0.3				<1
CORN 33	Wind Mountain	igneous rocks	nepheline syenite, TSNP2	New Mexico Bureau of Mines and Mineral Resources et al. (1998)	59.4	0.18	18.4	5.64	0.27	0.48	1.28	7.72	5.33	0.09	2.06	100.85		103	160	64	1759	214	53	7	22	<1	1	125	27	14	9.8	26	<2	7	5.5		21	1.9	<1	18	29		12	101	1.1				<1
CORN 34	Wind Mountain	igneous rocks	nepheline syenite, TSNP2	New Mexico Bureau of Mines and Mineral Resources et al. (1998)	58	0.08	17.7	4.58	0.27	0.19	0.73	8.04	5.48	0.08	3.35	98.5		89	200	62	2843	360	138	5	13	<1	7	250	46	26	18	51	<2	10.9	5.8		33	3	<1	3	32		12	225	0.8				<1
TNSP1	Wind Mountain	igneous rocks	nepheline syenite	McLemore et al. (1996)	58.67	0.19	17.8	5.96	0.28	0.44	1.19	8.12	5.33	0.1	2.2	100.28		106	157	69	1994	239	65		28			208				39								26	29			29
TSPfg1	Wind Mountain	igneous rocks	nepheline syenite	McLemore et al. (1996)	59	0.26	18.1	4.75	0.23	0.53	1.5	7.28	5.2	0.12	1.79	98.76		442	121	203	1165	157	40		28			121				22								13	23			22
TSPfg2	Wind Mountain	igneous rocks	nepheline syenite	McLemore et al. (1996)	59.2	0.13	18.5	4.78	0.26	0.49	0.94	7.66	5.31	0.06	3.27	100.6		106	165	109	2135	250	65		47			216				46									30			38
TSPfg3	Wind Mountain	igneous rocks	nepheline syenite	McLemore et al. (1996)	59	0.24	18	4.73	0.24	0.46	1.45	7	5.13	0.12	1.67	98.04		370	133	130	1326	178	44		31			132				30								18	24			28
TSPfg4	Wind Mountain	igneous rocks	nepheline syenite	McLemore et al. (1996)	59.5	0.24	18.3	4.65	0.23	0.35	1.19	6.72	5.27	0.11	1.64	98.2		439	122	135	949	126	36		36			107				16								17	24			18
VTM97-55	Hueco	igneous rocks	quartz monzonite	McLemore (2002)	64	0.47	15.7	3.81	0.1	1.24	3.9	4.41	3.63	0.19	2.65	100.1		1700	107	800	220	15	36	60	7	<1	4	37	7	1	2.8	12	3	<0.5	<1		3	<1	14	1			<1	10	<0.2				100
VTM97-350d	Hueco	igneous rocks	rhyolite	McLemore (2002)	68.8	0.21	15.2	1.34	<0.01	0.16	1.91	3.96	4.24	0.09	2.15	98.06		1500	127	455	110	9	<2	20	<2	<1	1.4	13	5	1	4.9	9	20	<0.5	4		3	<1	47	1			<1	14	0.4				290
VTM97-351d	Hueco	igneous rocks	rhyolite	McLemore (2002)	68.3	0.23	15.1	2.01	<0.01	0.36	1.34	5.78	3.49	0.08	1.95	98.64		1100	102	318	100	10	2	20	4	1	0.6	19	5	1	3.9	10	4	<0.5	1		3	<1	40	1			<1	14	0.3				250
VTM97-352d	Hueco	igneous rocks	rhyolite	McLemore (2002)	74.5	0.06	13.9	0.7	<0.01	0.1	0.15	3.42	4.61	<0.01	1.2	98.64		1300	162	173	62	13	<2	<10	<2	<1	2.2	29	3	1	3.3	5	6	<0.5	6		2	<1	22	2			<1	19	2.6				170
VTM97-326D	Hueco	igneous rocks	rhyolite	McLemore (2002)	76.6	0.07	13.6	0.54	0.05	0.19	<0.01	0.13	6.82	<0.01	2.1	100.1		1300	235	58	110	15	23	<10	4	<1	<0.5	35	3	<1	3.9	6	6	<0.5	15		2	<1	10	4			2	34	2.2				94
VTM97-327D	Hueco	igneous rocks	rhyolite	McLemore (2002)	75.2	0.07	13.7	0.68	0.03	0.37	0.08	2.18	5.23	<0.01	2.25	99.79		1600	171	187	130	18	24	<10	<2	<1	<0.5	19	5	<1	3.1	5	<1	<0.5	18		3	<1	15	2			1	12	2.1				140
VTM97-329D	Hueco	igneous rocks	rhyolite	McLemore (2002)	73.4	0.07	13.3	0.79	0.1	<0.01	1.34	3.35	4.98	0.02	1.65	99		1800	138	257	120	13	18	<10	2	6	6.3	20	3	1	3.4	5	<1	<0.5	1		<1	<1	19	1			3	20	0.5				150
VTM97-330D	Hueco	igneous rocks	rhyolite	McLemore (2002)	62.3	0.45	15.7	3.75	0.07	0.86	3.89	3.71	4.53	0.18	4.55	99.99		1500	156	497	250	17	36	60	5	<1	4.6	59	9	1	4.3	13	<1	<0.5	2		3	<1	28	7			3	23	0.9				200
VTM97-60	Hueco	igneous rocks	alkali-feldspar trachyte sill	McLemore (2002)	61.9	0.82	16.1	4.56	0.13	0.82	1.85	5.91	5.43	0.32	1.15	98.99		1200	130	250	650	87	62	10	<2	<1	<0.5	37	16	5	4.6	14	<1	<0.5	2		6	<1	8	1			<1	<2	0.2				58
VTM97-63	Hueco	igneous rocks	trachyte	McLemore (2002)	61.2	0.85	17	4.27	0.09	0.92	2.93	5.62	5.12	0.37	1.45	99.82		1100	111	491	560	58	63	10	6	<1	<0.5	65	14	4	3.2	10	<1	2.2	<1		5	<1	9	<1			<1	3	0.2				77
VTM97-179	Hueco	igneous rocks	syenite	McLemore (2002)	65.8	0.69	16.9	2.41	0.04	0.3	0.54	5.86	5.38	0.21	1.15	99.28		830	128	237	680	67	66	10	4	<1	<0.5	7.2	14	5	3.2	11	6	<0.5	<1		5	<1	4	<1			3	4	<0.2				43
VTM97-199	Hueco	igneous rocks	syenite	McLemore (2002)	64	0.65	17.4	2.77	0.09	0.36	1.44	6.1	5.81	0.16	0.2	98.98		570	163	303	630	88	45	20	5	<1	<0.5	17	16	3	4.7	20	2	<0.5	<1		7	<1	9	2			<1	14	<0.2				69
VTM97-212	Hueco	igneous rocks	syenite	McLemore (2002)	63.2	0.64	16.4	3.36	0.17	0.39	2.46	4.82	5.48	0.19	3.05	100.16		740	136	142	660	68	74	<10	5	<1	<0.5	54	20	4	4.6	13	3	0.8	<1		5	<1	6	<1			2	8	<0.2				59
VTM97-222	Hueco	igneous rocks	nepheline syenite	McLemore (2002)	60.8	1.16	17.9	3.37	0.08	0.82	3.29	6.39	4.65	0.31	0.55	99.32		950	88	669	590	110	64	50	6	<1	<0.5	39	15	11	3.9	16	1	<0.5	<1		5	<1	12	<1			2	7	0.3				100
VTM97-223	Hueco	igneous rocks	syenite	McLemore (2002)	63	0.77	18.3	2.21	<0.01	0.06	0.61	6.77	5.14	0.26	1.1	98.22		1500	146	372	570	59	41	30	4	<1	0.8	19	13	4	3.8	13	2	<0.5	6		4	<1	10	1			1	12	0.4				88
VTM97-224	Hueco	igneous rocks	syenite	McLemore (2002)	65.3	0.55	16.7	2.55	0.08	0.38	1.33	5.72	5.64	0.17	0.4	98.82		680	135	308	480	78	30	20	4	<1	<0.5	77	15	4	8	38	5	<0.5	<1		11	<1	11	2			<1	16	0.3				100
VTM97-382	Hueco	igneous rocks	syenite	McLemore (2002)	58.71	0.98	17.43	4.03	0.19	1.05	2.33	5.2	5.85	0.35	4.27	100.39		1209	144	406	494	67	30	35	53	4	6	297			4	14			<2								4	290
AS-5	Cornudas Mountains	igneous rocks	plug	Potter (1996)	55.15	1.51	18.41	6.28	0.16	1.96	4.24	4.44	6.01	0.72	0.98	99.86		1218	92	1008	524	98	31	180			9	76	11	7.2	3.6	14								1.7
DM-5	Cornudas Mountains	igneous rocks	Dog Mountain	Potter (1996)	59.03	0.11	17.81	5.1	0.31	0.13	0.9	5.15	8.28	0.04	1.92	98.78		14	191	19	1731	311	83	66			19	246	37	21	9.8	38								2.7
CD-7	Cornudas Mountains	igneous rocks	Cerro Diablo	Potter (1996)	60.83	0.22	17.62	6.29	0.25	0.37	1.65	5.21	6.71	0.07	1.62	100.84		15	159	61	1441	190	61	50			28	181	29	11	6.4	23								2.6
AS-2	Cornudas Mountains	igneous rocks		Potter (1996)	54.1	1.81	18.6	7.1	0.17	2.56	5.46	3.67	5.33	0.81	1.14	100.75
CH-1	Cornudas Mountains	igneous rocks	Chatfield	Potter (1996)	56.1	0.18	19.57	4.93	0.29	0.13	0.9	4.9	10.77	0.04	2.42	100.23
AL-11	Cornudas Mountains	igneous rocks	Alamo	Potter (1996)	58.4	0.21	18.8	4.72	0.26	0.14	0.81	4.98	9.51	0.07	1.35	99.25
AL-10	Cornudas Mountains	igneous rocks	Alamo	Potter (1996)	58.1	0.14	18.55	4.86	0.24	0.18	1.09	4.84	8.32	0.06	2.51	98.89
7369	Wind Mountain	mineralized vein		New Mexico Bureau of Mines and Mineral Resources et al. (1998)														710	370	62			256	10	24	418	33	308	95	110	82	350	<2	10.7	21		24	3.4	<1	<1			30	938	2.9		<0.01		<1
CORN	Wind Mountain	mineralized vein	syenite, TSNP2	New Mexico Bureau of Mines and Mineral Resources et al. (1998)														170	110	95			63	7	27	<1	5	181	34	20	16	50	5	7.3	6		29	2.3	<1	2			18	179	0.6		<0.02		<1
12-113	Wind Mountain	mineralized vein	margin of syenite dike	New Mexico Bureau of Mines and Mineral Resources et al. (1998)													<5	290	62	327			59	76	110	27	<1	<50	5	<0.5	1.3	11	5	<5	1.8		<2	1.8	2	2			5	<5	0.2		<0.01		<1
13-115	Wind Mountain	mineralized vein	limestone xenolith	New Mexico Bureau of Mines and Mineral Resources et al. (1998)													<5	430	44	557			77	63	82	<5	<1	<50	9	0.5	1.6	8.8	37	<5	3.7		<2	2	6	<1			<2	13	0.8		<0.01		<1
14-114	Wind Mountain	mineralized vein	syenite, TSNP2	New Mexico Bureau of Mines and Mineral Resources et al. (1998)														360	75	188			34	7	18	<1	1	73	15	7.6	5.7	16	4	1.2	2		9	2	2	1			10	44	0.3		<0.01		<1
15	Wind Mountain	mineralized vein	altered syenite, TSNP2	New Mexico Bureau of Mines and Mineral Resources et al. (1998)														990	110	413			33	10	43	<1	<1	141	19	8.3	5.1	14	<2	0.7	6.6		5	1.1	3	<1			10	<5	<0.1		<0.02		<1
19	Wind Mountain	mineralized vein	dump	New Mexico Bureau of Mines and Mineral Resources et al. (1998)																							10	62																15
17	Wind Mountain	mineralized vein	dump	New Mexico Bureau of Mines and Mineral Resources et al. (1998)																							122	122																195
18-111	Wind Mountain	mineralized vein	phonolite dike	New Mexico Bureau of Mines and Mineral Resources et al. (1998)														<50	180	127			108	10	37	<1	4	222	38	26	14	45	6	8.6	7.1		28	2.6	2	3			12	213	0.7		<0.02		<1
19	Wind Mountain	mineralized vein	dump	New Mexico Bureau of Mines and Mineral Resources et al. (1998)																							27	34																22
1	Wind Mountain	mineralized vein	2 ft chip phonolite dike	Schreiner (1994)													182	90			3156	392	97		8	1	16	184			15	51.6		<0.2	21		18.9		<1				4	34	<5
2	Wind Mountain	mineralized vein	3 ft chip phonolite	Schreiner (1994)													2031	250			2763	1345	246		11	6	5	464		96	136	335		<0.2	<5		26.1		2				31	494	<5
3	Wind Mountain	mineralized vein	2 ft chip phonolite	Schreiner (1994)													243	110			1862	436	54		12	2	4	67			10	40		<0.2	<5		11.4		<1				5	20	<5
4	Wind Mountain	mineralized vein	2 ft chip	Schreiner (1994)													627	850			733	167	40		21	12	9	43			4	15		<0.2	<5		6		6				4	6	<5
5	Wind Mountain	mineralized vein	4 ft chip porphyry	Schreiner (1994)													579	820			1000	161	31		4	1	<1	29			7	21		<0.2	<5		5.7		<1				3	12	<5
6	Wind Mountain	mineralized vein	grab dump	Schreiner (1994)													991	80			4002	2332	371		7	2	87	6		158	82	351		<0.2	<5		4.9		<1				125	279	<5
7	Wind Mountain	mineralized vein	1 ft chip nepheline plug	Schreiner (1994)													729	1100	112	878	642	111	28								4	15					5.4
8	Wind Mountain	mineralized vein	1 ft chip	Schreiner (1994)													547	1200			891	131	32		15	5	6	54			5	18		<0.2	<5		6.4		5				5	6	<5
9	Wind Mountain	mineralized vein	3 ft chip	Schreiner (1994)													343	220			1441	403	51		7	4	7	130			16	60.7		<0.2	<5		8.6		2				12	40	<5
10	Wind Mountain	mineralized vein	1 ft chip phonolite	Schreiner (1994)													905	240	288	104	3674	545	127								21	68.2					23.9
11	Wind Mountain	mineralized vein	3 ft chip	Schreiner (1994)													1495	630			2580	777	25		3	10	4	119		56	12	186		<0.2	<5		7.9		2				26	49	<5
12	Wind Mountain	mineralized vein	3 ft chip	Schreiner (1994)													859	320			3458	2270	290		13	17	4	108		118	102	391		<0.2	<5		9.3		2				5	254	<5
13	Wind Mountain	mineralized vein	3 ft chip	Schreiner (1994)													527	360			442	64	43		12	10	7	57			3	13		<0.2	<5		5.2		6				4	11	<5
14	Wind Mountain	mineralized vein	1 ft chip	Schreiner (1994)													724	480	199	241	1193	287	65								9	31		na			10.9
15	Wind Mountain	mineralized vein	grab of phonolite	Schreiner (1994)													1727	200			1834	443	108		7	<1	5	225			15	50		<0.2	<5		22.8		<1				13	43	<5
16	Deer Mountain	mineralized vein	1 ft chip	Schreiner (1994)													740	710	91	306	1142	134	38								5	17					8.8
17	Deer Mountain	mineralized vein	1 ft chip	Schreiner (1994)													482	600	126	279	1534	141	41								6	19					10.5
18	Wind Mountain	mineralized vein	1.5 ft chip	Schreiner (1994)													3137	140			3854	364	69		26	10	22	206			32	102		<0.2	<5		34.6		3				48	62	<5
19	Wind Mountain	mineralized vein	grab of dike	Schreiner (1994)													1944	130			9522	583	175		14	1	30	278			35	76.8		5.2	<5		33.9		<1				41	118	<5
20	Wind Mountain	mineralized vein	0.5 ft chip pegmatite	Schreiner (1994)													464	100			9919	798	106		14	<1	23	732			92	212		1.7	5		92		1				25	185	<5
21	Wind Mountain	mineralized vein	1 ft chip	Schreiner (1994)													674	80		781	1641	155	35		9	<1	6	26			6	19		<0.2	<5		13.1		<1				3	196	<5
22	Wind Mountain	mineralized vein	3 ft chip pegmatite	Schreiner (1994)													250	120			9914	306	190		14	<1	42	114			24	43		5	<5		27.7		1				38	86	<5
23	Wind Mountain	mineralized vein	0.5 ft chip	Schreiner (1994)													226	190	181	90	1878	246	60								11	39					17.2
24	Wind Mountain	mineralized vein	1 ft chip	Schreiner (1994)													310	260	179	86	1870	243	53								11	34					15.1
25	Wind Mountain	mineralized vein	1 ft chip	Schreiner (1994)													274	270	176	121	2267	285	66								13	48					19.3
26	Wind Mountain	mineralized vein	2 ft chip	Schreiner (1994)													251	150	185	41	2528	263	73								13	40					15.1
27	Wind Mountain	mineralized vein	1 ft chip	Schreiner (1994)													258	160	181	64	1572	203	46								10	31					12.2
28	Wind Mountain	mineralized vein	grab nepheline syenite	Schreiner (1994)													379	80	193	33	1226	168	50		13	<1	5	105			7	26		<0.2	<5		16		<1				5	21	<5
29	Wind Mountain	mineralized vein	2 ft chip	Schreiner (1994)													414	320	209	127	2073	266	63								11	44					19.5
30	Wind Mountain	mineralized vein	3 ft chip	Schreiner (1994)													1448	150			2425	518	73		12	2	4	347			27	111		<0.2	<5		19.4		1				7	49	<5
31	Wind Mountain	mineralized vein	1 ft chip	Schreiner (1994)													278	120	255	58	5456	569	96								49	127					52
32	Wind Mountain	mineralized vein	1 ft chip	Schreiner (1994)													2537	80			554	164	65		20	2	5	156			7	49		<0.2	5		21.5		1				108	14	<5
33	Wind Mountain	mineralized vein	5 ft chip	Schreiner (1994)													365	90	248	175	5472	611	111								22	90					35.5
34	Wind Mountain	mineralized vein	5 ft chip	Schreiner (1994)													310	100			6451	547	128		6	<1	8	192			19	78.9		0.5	<5		36.2		<1				4	65	<5
35	Wind Mountain	mineralized vein	3 ft chip	Schreiner (1994)													409	50			17	6	<1		5	<1	2	<1			4	0.9		0.3	<5		1.1		1				<1	5	<5
AC17	Aguachille	igneous rock	rhyolite	Simpkins(1983)	71.45	0.1	13.61	3.3	0.57		0.86	5.37	5.04	0.15		100.45		644	390		935	217	147	55.8	1.8			197		15.1		42.5								3.9
AC19	Aguachille	igneous rock	rhyolite	Simpkins(1983)	76.65	0.03	14.57	1.485	0.008		0.47		7.92	0.18		101.313		433	869		799	227	114	66.2				176		17.7		34.3								6.2
AC22	Aguachille	igneous rock	rhyolite	Simpkins(1983)	70.47	0.12	14.35	2.255	0.015		0.76	6.95	4.86	0.13		99.91		305	170	3.6	1015	170	98.5	29.2	7.3			158		11.1	9	34.6								1.9
AC11-81-1	Aguachille	igneous rock	rhyolite	Simpkins(1983)												0		448	1032		792	123	127	34.9	1.5			14		16		8.9								5.8
AC18	Aguachille	igneous rock	rhyolite	Simpkins(1983)	68.59	0.11	13.56	3.773	0.037		0.88	4.14	4.75	0.14		95.98		472	325		862	192	132	62.3	1.5			216		13.5		38.3								4
AC9-81-1	Aguachille	igneous rock	rhyolite	Simpkins(1983)	68.24	0.15	14.06	4.543	0.055		0.64	4.71	5.79	0.07		98.258		520	372		1000	157	187	41.7	2			260		16		8.6								5.2
RT4-96	Sierra Blanca	igneous rock	gray unaltered rhyolitr low Sr	Price et al. (1990)	70.48	0.02	13.43	3.267	0.08	0.01	0.02	7.42	4.07	<0.01	0.2	98.997	16800	8	1700	14	1000	350	200	7		32	68	590			38	200					58			62		480		280
RT3-130	Sierra Blanca	igneous rock	gray unaltered rhyolitr low Sr	Price et al. (1990)	70.5	0.02	13.73	3.201	0.08	0.01	0.03	6.72	4.2	<0.01	0.12	98.611	16900	8	2000	12	1100	400	200	6		29	51	580			66	200					31			75		470		320
RT337-310	Sierra Blanca	igneous rock	gray unaltered rhyolitr low Sr	Price et al. (1990)	70.56	0.03	13.52	3.245	0.08	0.04	0.06	6.89	4.04	<0.01	0.25	98.715	19700	6	1600	40	1200	420	240	<5		42	89	630			54	220					45			53		520		300
J85-55	Sierra Blanca	igneous rock	gray unaltered rhyolitr low Sr	Price et al. (1990)	72.47	0.02	13.68	1.474	0.08	0.01	0.08	6.48	4.22	<0.01	0.13	98.644	19400	5	2000	32	1000	340	200	<5		<5	13	610			54	230					180			83		460		320
RT287-200	Sierra Blanca	igneous rock	gray unaltered rhyolitr low Sr	Price et al. (1990)	72.53	0.03	13.49	2.827	0.08	0.01	0.02	6.29	4.12	<0.01	0.14	99.537	13800	12	2000	7	1100	410	230	<5		21	45	620			35	210					14			51		500		300
RT1-230.5	Sierra Blanca	igneous rock	lowSr rhyolite	Price et al. (1990)	73.15	0.02	13.71	1.892	0.08	0.01	0.03	5.34	4.2	<0.01	0.39	98.822	3100	8	2200	7	1100	370	200	<5		16	37	590			36	170					19			49		490		250
J87-73	Sierra Blanca	igneous rock	gray, highSr rhyolite	Price et al. (1990)	69.34	0.03	13.43	3.938	0.1	0.17	0.67	5.74	4.02	<0.01	0.59	98.028	17200	10	1800	290	1100	380	280	<5		29	49	590			51	250					57			93		470		320
J87-72	Sierra Blanca	igneous rock	gray, highSr rhyolite	Price et al. (1990)	70.1	0.03	13.62	3.773	0.09	0.22	1.32	5.51	4.23	<0.01	0.82	99.713	16300	19	1900	230	1200	370	310	<5		26	46	620			21	210					46			86		470		290
RT336-200	Sierra Blanca	igneous rock	gray, highSr rhyolite	Price et al. (1990)	70.9	0.02	13.19	3.388	0.08	0.05	1.62	5.29	3.9	<0.01	0.43	98.868	13300	15	1500	120	1000	380	250	5		27	40	580			46	190					26			67		470		210
RT283-182.5	Sierra Blanca	igneous rock	gray, highSr rhyolite	Price et al. (1990)	71.55	0.04	13.26	2.409	0.08	0.12	1.16	5.44	4.32	<0.01	0.31	98.689	11800	22	1800	140	1100	400	240	5		22	62	630			56	230					18			58		510		290
RT5-169	Sierra Blanca	igneous rock	gray, highSr rhyolite	Price et al. (1990)	71.94	0.02	13.55	3.08	0.08	0.14	0.33	5.61	4.09	<0.01	0.41	99.25	12400	14	1700	90	1100	410	280	<5		25	52	600			40	210					13			56		510		250
RT2-34	Sierra Blanca	igneous rock	gray, highSr rhyolite	Price et al. (1990)	71.97	0.02	13.99	2.75	0.08	0.45	0.15	5.74	4.13	<0.01	0.41	99.69	15700	14	2000	220	1100	390	230	<5		23	45	580			28	180					13			48		520		240
RT201-355	Sierra Blanca	igneous rock	gray, highSr rhyolite	Price et al. (1990)	72.2	0.02	13.69	2.838	0.07	0.2	0.44	5.56	4.09	<0.01	0.55	99.658	13200	7	2000	100	1100	380	220	6		23	56	550			33	190					100			49		480		260
TrippleHill	Sierra Blanca	igneous rock	rhyolite	Price et al. (1990)	71.9	0.27	14.8	1.518	0.03	0.22	1.03	4.17	4.69	0.08	0.69	99.398	1900	860		160	290		54								4	40					7					28		40
SierraBlanca	Sierra Blanca	igneous rock	rhyolite	Price et al. (1990)	74.4	0.02	14.1	0.869	0.05	0.01	0.45	5.06	4.3	<0.01	0.33	99.589	6500	16	1090	9	100	72	200														4			30		170
[truncated: 15 more columns]

## Sheet: Reference
Allen, M.S. and McLemore, V.T., 1991, The geology and petrogenesis of the Capitan pluton, New Mexico, in Barker, J.M., Kues, B.S., Austin, G.S., and Lucas, S.G., eds., Geology of the Sierra Blanca, Sacramento, and Capitan Ranges, New Mexico: New Mexico Geological Society, 42nd Annual Field Conference, Guidebook, p. 115-127.
Dunbar, N.W., Campbell, A.R., and Candela, P.A., 1996, Physical, chemical, and mineralogical evidence for magmatic fluid migration within the Capitan pluton, southeastern New Mexico: Geological Society of America Bulletin, v. 108, p. 318-333.
Korzeb, S.L. and Kness, R.F., 1992, Mineral resource investigation of the Roswell Resource Area, Chavez, Curry, DeBaca, Guadalupe, Lincoln, Quay and Roosevelt Counties, New Mexico: U.S. Bureau of Mines, Open-file Report MLA 12-92, 220 p.
McLemore, V.T., 2002, Geology and geochemistry of the Mid-Tertiray alkaline to calc-alkaline intrusions in the northern Hueco Mountains and adjacent areas, McGregor Range, southern Otero County, New Mexico: New Mexico Geological Society, Guidebook 52, p. 129-137.
McLemore, V.T., 2010, Geology and mineral deposits of the Gallinas Mountains, Lincoln and Torrance Counties, New Mexico; preliminary report: New Mexico Bureau of Geology and Mineral Resources, Open-file report OF-532, 92 p.
McLemore, V.T., 2015, Geology and Mineral Resources of the Laughlin Peak mining district, Colfax County, New Mexico: New Mexico Geological Society, Guidebook 66, p. 277-288, https://nmgs.nmt.edu/publications/guidebooks/papers.cfml?v=66&file=66_p0277_p0288.pdf.
McLemore, V.T., Lueth, V.W., Pease, T.C., and Gulinger, J.R., 1996, Petrology and mineral resources of the Wind Mountain laccolith, Cornudas Mountains, New Mexico and Texas: Canadian Mineralogist, v. 34, pt. 2, p. 335-347.
McLemore, V.T. and Phillips, R.S., 1991, Geology of mineralization and associated alteration in the Capitan Mountains, Lincoln County, New Mexico: New Mexico Geological Society, Guidebook 42, p. 291-298.
New Mexico Bureau of Mines and Mineral Resources, New Mexico State University Southwest Technology Institute, and TRC Mariah Associates, Inc., 1998, Mineral and energy resource assessment of the McGregor Range (Fort Bliss), Otero County, New Mexico: New Mexico Bureau of Mines and Mineral Resources OF- 458, 543 p.
Potter, L.S., 1988, Petrology and petrogenesis of Tertiary igneous rocks, Chico Hills, New Mexico [M.S. thesis]: Iowa State University, Ames, IA, 179 p.
Potter, L.S., 1996, Chemical variation along strike in feldspathoidal rocks of the eastern alkali belt, Trans-Pecos magmatic province, Texas and New Mexico: The Canadian Mineralogist, v. 34, p. 241-264.
Price, J.G., Rubin, J.N,, Henry, C.D., Pinkston, T.L., Tweedy, S.W. and Koppenaal, D.W., 1990, Rare-metal enriched peraluminous rhyolites in a continental arc, Sierra Blanca area, Trans-Pecos Texas; chemical modification by vapor-phase crystallization; in H.J. Stein and Hannah, J.L., Ore-bearing granite systems; Petrogenesis and mineralizing processes: Geological Society of America, Special Paper…
Schreiner, R.A., 1991, Preliminary investigations of rare-earth-element-bearing veins, breccias, and carbonatites in the Laughlin Peak area, Colfax County, New Mexico: U.S. Bureau of Mines, MLA 99-93, 189 p.
Schreiner, R.A., 1993, Mineral investigation of the rare-earth-element-bearing deposits, Red Cloud Mining district, Gallinas Mountains, Lincoln County, New Mexico: U.S. Bureau of Mines, Open-file Report 2-91, 62 p.
Schreiner, R.A., 1994, Mineral investigation of Wind Mountain and the Chess Draw area, Cornudas Mountains, Otero County, New Mexico: U.S. Bureau of Mines, MLA 26-94, 51 p.
Simkins, T.H., 1983, Geology and geochemistry of the Aguachile Mountain fluorspar-beryllium mining district, northern Coahuila, Mexico: M.S. thesis, Sul Ross State University, Alpine, TX, 137 p.
Staatz, M.H., 1985, Geology and description of the thorium and rare-earth veins in the Laughlin Peak area, Colfax County, New Mexico: U.S. Geological Survey, Professional Paper 1049-E, 32 p.
